# Supplementary material
Source: publisher figshare collection journal article supplement (https://geolsoc.figshare.com/articles/dataset/_/3454421)
Supplement: Supplementary file 1 [file 1]

**Table S1**, LA-ICPMS isotopic data and U-Pb ages (in 106 yrs) for all samples.

| **Ratios** | | | | | | | | | |  | **Ages** | | | | | | |
| --- | --- | --- | --- | --- | --- | --- | --- | --- | --- | --- | --- | --- | --- | --- | --- | --- | --- |
| 207Pb  235U | error (2s%) | 206Pb  238U | | | error (2s%) | 207Pb  206U | | | error  (2s%) | 207Pb  235U | | error  (1s abs) | 206Pb  238U | error  (1s abs) | 207Pb  206U | error  (1s abs) | % dis-cordance |
|  | | | | |  |  | | |  |  | |  |  |  |  |  |  |
| **Ayn Formation (Mirbat)** | | | | |  |  | | |  |  | |  |  |  |  |  |  |
| 1.7271 | 3.7 | 0.17922 | | | 1.0 | 0.06988 | | | 3.8 | 1028 | | 11 | 1059 | 5 | 962 | 35 | -10 |
| 1.5578 | 4.7 | 0.16874 | | | 1.5 | 0.06694 | | | 4.7 | 954 | | 15 | 1005 | 7 | 834 | 48 | -21 |
| 1.5075 | 5.0 | 0.15981 | | | 1.4 | 0.06840 | | | 5.3 | 933 | | 15 | 956 | 6 | 880 | 55 | -9 |
| 1.4997 | 6.8 | 0.15844 | | | 2.0 | 0.06864 | | | 6.7 | 930 | | 21 | 948 | 9 | 886 | 69 | -7 |
| 1.4530 | 5.7 | 0.15824 | | | 1.6 | 0.06659 | | | 6.0 | 911 | | 17 | 947 | 7 | 824 | 63 | -15 |
| 1.4530 | 5.7 | 0.15824 | | | 1.6 | 0.06659 | | | 6.0 | 911 | | 17 | 947 | 7 | 824 | 63 | -15 |
| 1.6320 | 4.1 | 0.15784 | | | 1.2 | 0.07498 | | | 4.3 | 983 | | 13 | 945 | 5 | 1066 | 43 | 11 |
| 1.4209 | 4.8 | 0.15668 | | | 1.3 | 0.06576 | | | 5.0 | 898 | | 14 | 938 | 6 | 798 | 53 | -18 |
| 1.4497 | 4.9 | 0.15628 | | | 1.4 | 0.06726 | | | 4.9 | 936 | | 13 | 936 | 6 | 936 | 43 | 0 |
| 1.4073 | 4.5 | 0.15577 | | | 1.3 | 0.06551 | | | 4.6 | 892 | | 13 | 933 | 6 | 790 | 47 | -18 |
| 1.4046 | 5.2 | 0.15305 | | | 1.6 | 0.06655 | | | 5.5 | 891 | | 15 | 918 | 7 | 822 | 57 | -12 |
| 1.4084 | 6.3 | 0.15190 | | | 1.9 | 0.06723 | | | 6.7 | 892 | | 19 | 912 | 8 | 844 | 70 | -8 |
| 1.3958 | 5.1 | 0.15145 | | | 1.4 | 0.06683 | | | 5.2 | 887 | | 15 | 909 | 6 | 832 | 55 | -9 |
| 1.4361 | 4.1 | 0.14989 | | | 1.2 | 0.06947 | | | 4.1 | 904 | | 13 | 906 | 5 | 900 | 46 | -1 |
| 1.4177 | 7.5 | 0.14973 | | | 2.2 | 0.06866 | | | 8.0 | 984 | | 16 | 903 | 9 | 1170 | 55 | 23 |
| 1.4085 | 6.4 | 0.15000 | | | 1.7 | 0.06809 | | | 6.8 | 992 | | 13 | 902 | 7 | 1194 | 45 | 24 |
| 1.4346 | 6.0 | 0.14992 | | | 1.7 | 0.06939 | | | 6.4 | 904 | | 18 | 900 | 7 | 912 | 67 | 1 |
| 1.4732 | 3.7 | 0.14903 | | | 1.1 | 0.07168 | | | 4.0 | 919 | | 11 | 896 | 5 | 976 | 41 | 8 |
| 1.4125 | 7.8 | 0.14897 | | | 2.3 | 0.06876 | | | 8.4 | 894 | | 23 | 895 | 10 | 890 | 87 | -1 |
| 1.4419 | 9.7 | 0.14822 | | | 2.5 | 0.07054 | | | 11.4 | 907 | | 29 | 891 | 10 | 944 | 117 | 6 |
| 1.3300 | 5.1 | 0.14818 | | | 1.4 | 0.06508 | | | 5.3 | 859 | | 15 | 891 | 6 | 776 | 55 | -15 |
| 1.3601 | 6.5 | 0.14783 | | | 1.7 | 0.06671 | | | 6.8 | 872 | | 19 | 889 | 7 | 828 | 71 | -7 |
| 1.3768 | 3.1 | 0.14774 | | | 0.9 | 0.06757 | | | 3.2 | 879 | | 9 | 888 | 4 | 854 | 34 | -4 |
| 1.4098 | 8.2 | 0.14754 | | | 2.4 | 0.06929 | | | 8.9 | 893 | | 24 | 887 | 10 | 906 | 92 | 2 |
| 1.4383 | 4.4 | 0.14738 | | | 1.2 | 0.07077 | | | 4.6 | 905 | | 13 | 886 | 5 | 950 | 47 | 7 |
| 1.4985 | 2.6 | 0.14675 | | | 0.8 | 0.07404 | | | 2.8 | 930 | | 8 | 883 | 3 | 1042 | 28 | 15 |
| 1.3837 | 3.8 | 0.14653 | | | 1.3 | 0.06847 | | | 3.8 | 882 | | 11 | 881 | 5 | 882 | 40 | 0 |
| 1.3219 | 4.4 | 0.14578 | | | 1.3 | 0.06575 | | | 4.7 | 881 | | 12 | 877 | 5 | 888 | 43 | 1 |
| 1.4660 | 3.4 | 0.14557 | | | 1.2 | 0.07303 | | | 3.5 | 916 | | 10 | 876 | 5 | 1014 | 35 | 14 |
| 1.3532 | 4.2 | 0.14542 | | | 1.2 | 0.06747 | | | 4.3 | 869 | | 12 | 875 | 5 | 852 | 45 | -3 |
| 1.3331 | 4.2 | 0.14513 | | | 1.2 | 0.06661 | | | 4.4 | 860 | | 12 | 874 | 5 | 824 | 46 | -6 |
| 1.5651 | 9.6 | 0.14481 | | | 2.4 | 0.07837 | | | 9.8 | 957 | | 30 | 872 | 10 | 1156 | 98 | 25 |
| 1.4340 | 4.9 | 0.15454 | | | 1.4 | 0.06728 | | | 4.9 | 892 | | 12 | 871 | 6 | 942 | 45 | 8 |
| 1.3768 | 3.3 | 0.14289 | | | 0.9 | 0.06987 | | | 3.4 | 884 | | 10 | 871 | 4 | 916 | 35 | 5 |
| 1.4259 | 4.9 | 0.14452 | | | 1.4 | 0.07155 | | | 5.2 | 900 | | 14 | 870 | 6 | 972 | 53 | 10 |
| 1.3282 | 3.7 | 0.14428 | | | 1.2 | 0.06675 | | | 4.1 | 858 | | 11 | 869 | 5 | 830 | 42 | -5 |
| 1.3006 | 9.8 | 0.14420 | | | 2.4 | 0.06540 | | | 10.2 | 846 | | 28 | 868 | 10 | 786 | 107 | -10 |
| 1.3645 | 2.9 | 0.14417 | | | 0.9 | 0.06863 | | | 3.1 | 874 | | 9 | 868 | 4 | 886 | 32 | 2 |
| 1.4727 | 3.1 | 0.14406 | | | 0.9 | 0.07413 | | | 3.1 | 919 | | 9 | 868 | 4 | 1044 | 31 | 17 |
| 1.3284 | 4.2 | 0.14389 | | | 1.3 | 0.06694 | | | 4.3 | 858 | | 12 | 867 | 5 | 834 | 45 | -4 |
| 1.3047 | 4.4 | 0.14364 | | | 1.2 | 0.06586 | | | 4.5 | 848 | | 13 | 865 | 5 | 802 | 47 | -8 |
| 1.3246 | 4.9 | 0.14334 | | | 1.6 | 0.06701 | | | 5.0 | 857 | | 14 | 864 | 7 | 838 | 52 | -3 |
| 1.3430 | 3.4 | 0.14235 | | | 1.0 | 0.06841 | | | 3.6 | 865 | | 10 | 858 | 4 | 880 | 37 | 3 |
| 1.3012 | 5.7 | 0.14251 | | | 1.7 | 0.06621 | | | 6.1 | 836 | | 16 | 858 | 7 | 778 | 63 | -10 |
| 1.3344 | 5.4 | 0.14229 | | | 1.6 | 0.06800 | | | 5.8 | 861 | | 16 | 858 | 7 | 868 | 60 | 1 |
| 1.3331 | 3.6 | 0.14204 | | | 1.0 | 0.06805 | | | 3.7 | 860 | | 10 | 856 | 4 | 870 | 39 | 2 |
| 1.3594 | 5.8 | 0.14079 | | | 1.9 | 0.07001 | | | 6.1 | 876 | | 17 | 855 | 8 | 928 | 63 | 8 |
| 1.2750 | 3.4 | 0.14173 | | | 0.9 | 0.06523 | | | 3.4 | 835 | | 10 | 854 | 4 | 780 | 36 | -10 |
| 1.3061 | 6.2 | 0.14170 | | | 1.7 | 0.06683 | | | 6.3 | 848 | | 18 | 854 | 7 | 832 | 66 | -3 |
| 1.3041 | 3.7 | 0.14126 | | | 1.1 | 0.06694 | | | 3.9 | 848 | | 11 | 852 | 4 | 834 | 40 | -2 |
| 1.2990 | 6.3 | 0.14114 | | | 1.7 | 0.06674 | | | 6.2 | 845 | | 18 | 851 | 7 | 828 | 65 | -3 |
| 1.2661 | 3.4 | 0.14114 | | | 1.0 | 0.06505 | | | 3.5 | 831 | | 10 | 851 | 4 | 774 | 37 | -10 |
| 1.3214 | 2.7 | 0.14097 | | | 0.8 | 0.06797 | | | 2.8 | 855 | | 8 | 850 | 3 | 866 | 29 | 2 |
| Ratios | | | | | | | | | |  | Ages | | | | | | |
| 207Pb  235U | error (2s%) | 206Pb  238U | | | error (2s%) | 207Pb  206U | | | error  (2s%) | 207Pb  235U | | error  (1s abs) | 206Pb  238U | error  (1s abs) | 207Pb  206U | error  (1s abs) | % dis-cordance |
| 1.2502 | 6.3 | 0.14096 | | | 1.7 | 0.06431 | | | 6.7 | 824 | | 18 | 850 | 7 | 750 | 71 | -13 |
| 1.3436 | 6.7 | 0.14095 | | | 1.9 | 0.06912 | | | 7.1 | 865 | | 20 | 850 | 7 | 902 | 73 | 6 |
| 1.4675 | 7.0 | 0.14076 | | | 2.0 | 0.07560 | | | 7.7 | 917 | | 21 | 849 | 8 | 1084 | 77 | 22 |
| 1.2852 | 6.4 | 0.14069 | | | 1.7 | 0.06624 | | | 6.8 | 839 | | 18 | 849 | 7 | 814 | 71 | -4 |
| 1.2402 | 4.2 | 0.14051 | | | 1.2 | 0.06400 | | | 4.5 | 819 | | 12 | 848 | 5 | 740 | 48 | -15 |
| 1.3262 | 4.8 | 0.14027 | | | 1.4 | 0.06856 | | | 4.9 | 857 | | 14 | 846 | 6 | 884 | 50 | 4 |
| 1.3918 | 4.9 | 0.14019 | | | 1.5 | 0.07199 | | | 5.0 | 885 | | 15 | 846 | 6 | 984 | 50 | 14 |
| 1.3164 | 2.7 | 0.13998 | | | 0.8 | 0.06819 | | | 2.9 | 853 | | 8 | 845 | 3 | 874 | 29 | 3 |
| 1.3720 | 2.8 | 0.13985 | | | 0.9 | 0.07114 | | | 2.9 | 877 | | 8 | 844 | 3 | 962 | 30 | 12 |
| 1.2887 | 3.9 | 0.13583 | | | 1.1 | 0.06880 | | | 4.0 | 875 | | 11 | 843 | 5 | 956 | 42 | 12 |
| 1.3408 | 8.9 | 0.13964 | | | 2.9 | 0.06963 | | | 9.3 | 864 | | 26 | 843 | 11 | 916 | 95 | 8 |
| 1.2791 | 5.1 | 0.13961 | | | 1.5 | 0.06643 | | | 5.4 | 836 | | 14 | 842 | 6 | 820 | 56 | -3 |
| 1.3375 | 5.7 | 0.13942 | | | 1.6 | 0.06957 | | | 6.0 | 862 | | 17 | 841 | 6 | 914 | 62 | 8 |
| 1.2600 | 4.1 | 0.13937 | | | 1.1 | 0.06555 | | | 4.3 | 828 | | 12 | 841 | 4 | 792 | 45 | -6 |
| 1.3011 | 3.5 | 0.13937 | | | 1.1 | 0.06769 | | | 3.5 | 846 | | 10 | 841 | 4 | 858 | 36 | 2 |
| 1.2855 | 4.1 | 0.13924 | | | 1.4 | 0.06694 | | | 4.4 | 848 | | 11 | 840 | 6 | 866 | 43 | 3 |
| 1.3372 | 6.9 | 0.14130 | | | 1.8 | 0.06862 | | | 7.0 | 853 | | 20 | 839 | 7 | 888 | 73 | 6 |
| 1.2954 | 3.1 | 0.13894 | | | 0.9 | 0.06761 | | | 3.3 | 844 | | 9 | 839 | 4 | 856 | 33 | 2 |
| 1.3928 | 5.7 | 0.13889 | | | 1.7 | 0.07272 | | | 6.0 | 886 | | 17 | 838 | 6 | 1006 | 62 | 17 |
| 1.2713 | 3.3 | 0.13879 | | | 1.0 | 0.06642 | | | 3.4 | 833 | | 9 | 838 | 4 | 818 | 35 | -2 |
| 1.3238 | 3.6 | 0.13878 | | | 1.1 | 0.06917 | | | 3.7 | 856 | | 10 | 838 | 4 | 902 | 38 | 7 |
| 1.3193 | 2.9 | 0.13876 | | | 1.0 | 0.06894 | | | 3.0 | 854 | | 8 | 838 | 4 | 896 | 30 | 7 |
| 1.2956 | 3.0 | 0.13871 | | | 0.9 | 0.06773 | | | 3.0 | 844 | | 8 | 837 | 4 | 860 | 31 | 3 |
| 1.3074 | 3.5 | 0.13870 | | | 1.0 | 0.06835 | | | 3.6 | 849 | | 10 | 837 | 4 | 878 | 37 | 5 |
| 1.2810 | 4.2 | 0.13868 | | | 1.3 | 0.06698 | | | 4.4 | 837 | | 12 | 837 | 5 | 836 | 45 | 0 |
| 1.2744 | 6.1 | 0.13864 | | | 1.8 | 0.06665 | | | 6.1 | 834 | | 17 | 837 | 7 | 826 | 64 | -1 |
| 1.3054 | 4.3 | 0.13848 | | | 1.3 | 0.06835 | | | 4.4 | 848 | | 12 | 836 | 5 | 878 | 46 | 5 |
| 1.2400 | 3.7 | 0.13840 | | | 1.1 | 0.06497 | | | 4.0 | 819 | | 10 | 836 | 4 | 772 | 42 | -8 |
| 1.2575 | 5.5 | 0.13814 | | | 1.6 | 0.06601 | | | 5.8 | 827 | | 16 | 834 | 6 | 806 | 60 | -3 |
| 1.3267 | 3.5 | 0.13805 | | | 1.0 | 0.06969 | | | 3.7 | 857 | | 10 | 834 | 4 | 918 | 38 | 9 |
| 1.3573 | 12.7 | 0.13797 | | | 3.1 | 0.07133 | | | 13.1 | 871 | | 37 | 833 | 12 | 966 | 134 | 14 |
| 1.2675 | 4.7 | 0.13779 | | | 1.5 | 0.06670 | | | 4.9 | 831 | | 13 | 832 | 6 | 828 | 51 | -1 |
| 1.2904 | 3.6 | 0.13766 | | | 1.1 | 0.06797 | | | 3.7 | 841 | | 10 | 831 | 4 | 866 | 38 | 4 |
| 1.2983 | 5.8 | 0.13755 | | | 1.7 | 0.06844 | | | 6.3 | 845 | | 17 | 831 | 7 | 880 | 65 | 6 |
| 1.3279 | 3.5 | 0.13750 | | | 1.0 | 0.07003 | | | 3.5 | 858 | | 10 | 830 | 4 | 928 | 36 | 11 |
| 1.3187 | 5.7 | 0.13743 | | | 1.5 | 0.06958 | | | 5.9 | 854 | | 16 | 830 | 6 | 914 | 60 | 9 |
| 1.2386 | 5.0 | 0.13720 | | | 1.3 | 0.06546 | | | 5.2 | 833 | | 13 | 829 | 5 | 844 | 48 | 2 |
| 1.2588 | 4.0 | 0.13707 | | | 1.3 | 0.06659 | | | 4.2 | 827 | | 11 | 828 | 5 | 824 | 44 | 0 |
| 1.1815 | 7.5 | 0.13701 | | | 2.0 | 0.06253 | | | 8.5 | 792 | | 21 | 828 | 8 | 692 | 91 | -20 |
| 1.2874 | 4.0 | 0.13660 | | | 1.1 | 0.06834 | | | 4.1 | 840 | | 11 | 825 | 4 | 878 | 42 | 6 |
| 1.2921 | 5.2 | 0.13549 | | | 1.4 | 0.06915 | | | 5.6 | 883 | | 11 | 824 | 4 | 1032 | 39 | 20 |
| 1.3028 | 7.7 | 0.13626 | | | 2.3 | 0.06933 | | | 8.1 | 847 | | 22 | 823 | 9 | 908 | 84 | 9 |
| 1.3532 | 8.1 | 0.13610 | | | 2.4 | 0.07210 | | | 8.4 | 869 | | 24 | 823 | 9 | 988 | 86 | 17 |
| 1.3173 | 5.6 | 0.13594 | | | 1.5 | 0.07027 | | | 5.7 | 853 | | 16 | 822 | 6 | 936 | 58 | 12 |
| 1.2303 | 6.3 | 0.13588 | | | 1.6 | 0.06565 | | | 6.6 | 814 | | 18 | 821 | 6 | 794 | 69 | -3 |
| 1.2624 | 4.3 | 0.13532 | | | 1.2 | 0.06765 | | | 4.6 | 829 | | 12 | 818 | 5 | 856 | 48 | 4 |
| 1.2392 | 2.7 | 0.13521 | | | 0.8 | 0.06646 | | | 2.8 | 819 | | 8 | 818 | 3 | 820 | 29 | 0 |
| 1.2352 | 2.9 | 0.13509 | | | 0.8 | 0.06630 | | | 3.0 | 817 | | 8 | 817 | 3 | 814 | 31 | 0 |
| 1.2089 | 3.5 | 0.13483 | | | 1.1 | 0.06501 | | | 3.6 | 805 | | 10 | 815 | 4 | 774 | 39 | -5 |
| 1.2434 | 3.1 | 0.13477 | | | 0.9 | 0.06690 | | | 3.3 | 820 | | 9 | 815 | 3 | 834 | 34 | 2 |
| 1.2229 | 3.7 | 0.13470 | | | 1.1 | 0.06583 | | | 3.8 | 811 | | 10 | 815 | 4 | 800 | 40 | -2 |
| 1.2399 | 3.4 | 0.13468 | | | 1.0 | 0.06676 | | | 3.6 | 819 | | 10 | 814 | 4 | 830 | 37 | 2 |
| 1.3061 | 4.9 | 0.13463 | | | 1.7 | 0.07034 | | | 5.2 | 848 | | 14 | 814 | 6 | 852 | 51 | 4 |
| 1.2578 | 4.2 | 0.13437 | | | 1.2 | 0.06788 | | | 4.3 | 841 | | 11 | 814 | 5 | 912 | 41 | 11 |
| 1.2231 | 5.0 | 0.13455 | | | 1.5 | 0.06591 | | | 5.2 | 811 | | 14 | 814 | 6 | 802 | 55 | -1 |
| 1.2420 | 5.2 | 0.13431 | | | 1.4 | 0.06705 | | | 5.4 | 820 | | 15 | 812 | 5 | 838 | 56 | 3 |
| Ratios | | | | | | | | | |  | Ages | | | | | | |
| 207Pb  235U | error (2s%) | 206Pb  238U | | | error (2s%) | 207Pb  206U | | | error  (2s%) | 207Pb  235U | | error  (1s abs) | 206Pb  238U | error  (1s abs) | 207Pb  206U | error  (1s abs) | % dis-cordance |
| 1.2495 | 4.8 | 0.13429 | | | 1.5 | 0.06747 | | | 4.9 | 823 | | 14 | 812 | 6 | 852 | 51 | 5 |
| 1.2123 | 3.2 | 0.13427 | | | 1.0 | 0.06547 | | | 3.3 | 806 | | 9 | 812 | 4 | 788 | 34 | -3 |
| 1.3118 | 5.8 | 0.13412 | | | 1.8 | 0.07092 | | | 6.3 | 851 | | 17 | 811 | 7 | 954 | 64 | 15 |
| 1.2446 | 3.2 | 0.13382 | | | 1.0 | 0.06744 | | | 3.2 | 821 | | 9 | 810 | 4 | 850 | 34 | 5 |
| 1.2561 | 3.4 | 0.13359 | | | 0.9 | 0.06818 | | | 3.5 | 832 | | 9 | 809 | 3 | 894 | 34 | 9 |
| 1.1718 | 6.2 | 0.12641 | | | 1.9 | 0.06721 | | | 6.6 | 817 | | 17 | 808 | 7 | 840 | 69 | 4 |
| 1.2423 | 3.5 | 0.13341 | | | 1.0 | 0.06752 | | | 3.5 | 820 | | 10 | 807 | 4 | 852 | 37 | 5 |
| 1.2668 | 7.8 | 0.13328 | | | 2.1 | 0.06892 | | | 8.3 | 831 | | 22 | 807 | 8 | 896 | 85 | 10 |
| 1.2313 | 4.1 | 0.13327 | | | 1.4 | 0.06700 | | | 4.2 | 815 | | 12 | 806 | 5 | 836 | 44 | 4 |
| 1.3352 | 7.3 | 0.13532 | | | 2.1 | 0.07155 | | | 7.8 | 852 | | 21 | 805 | 8 | 974 | 79 | 17 |
| 1.2808 | 6.5 | 0.13301 | | | 1.8 | 0.06982 | | | 6.8 | 837 | | 19 | 805 | 7 | 922 | 70 | 13 |
| 1.3388 | 4.5 | 0.14318 | | | 1.4 | 0.06780 | | | 4.8 | 809 | | 14 | 803 | 6 | 822 | 56 | 2 |
| 1.2099 | 6.0 | 0.13259 | | | 1.6 | 0.06617 | | | 6.3 | 805 | | 17 | 803 | 6 | 810 | 67 | 1 |
| 1.1923 | 5.5 | 0.13249 | | | 1.6 | 0.06526 | | | 5.9 | 816 | | 14 | 803 | 6 | 852 | 57 | 6 |
| 1.2641 | 4.9 | 0.13258 | | | 1.3 | 0.06914 | | | 5.0 | 830 | | 14 | 803 | 5 | 902 | 51 | 11 |
| 1.2146 | 4.9 | 0.13250 | | | 1.5 | 0.06647 | | | 5.1 | 807 | | 14 | 802 | 5 | 820 | 53 | 2 |
| 1.1880 | 5.7 | 0.13240 | | | 1.5 | 0.06507 | | | 6.0 | 795 | | 16 | 802 | 6 | 776 | 62 | -3 |
| 1.2495 | 3.8 | 0.13220 | | | 1.0 | 0.06854 | | | 3.7 | 823 | | 11 | 800 | 4 | 884 | 38 | 9 |
| 1.2254 | 5.4 | 0.13190 | | | 1.6 | 0.06737 | | | 5.4 | 812 | | 15 | 799 | 6 | 848 | 57 | 6 |
| 1.2794 | 5.1 | 0.13173 | | | 1.4 | 0.07042 | | | 5.3 | 837 | | 15 | 798 | 5 | 940 | 55 | 15 |
| 1.2585 | 3.1 | 0.13166 | | | 1.0 | 0.06931 | | | 3.2 | 825 | | 9 | 797 | 4 | 902 | 33 | 12 |
| 1.2405 | 5.1 | 0.13136 | | | 1.5 | 0.06848 | | | 5.3 | 819 | | 14 | 796 | 6 | 882 | 55 | 10 |
| 1.2330 | 4.7 | 0.13136 | | | 1.3 | 0.06806 | | | 4.9 | 841 | | 12 | 794 | 5 | 966 | 43 | 18 |
| 1.2742 | 3.2 | 0.13082 | | | 0.9 | 0.07063 | | | 3.3 | 836 | | 9 | 793 | 3 | 954 | 34 | 17 |
| 1.2353 | 5.6 | 0.13043 | | | 1.6 | 0.06867 | | | 5.8 | 817 | | 16 | 790 | 6 | 888 | 59 | 11 |
| 1.1941 | 5.2 | 0.13035 | | | 1.4 | 0.06642 | | | 5.4 | 798 | | 14 | 790 | 5 | 818 | 56 | 3 |
| 1.2291 | 6.4 | 0.13031 | | | 1.8 | 0.06840 | | | 6.7 | 814 | | 18 | 790 | 7 | 880 | 70 | 10 |
| 1.2356 | 6.7 | 0.13012 | | | 1.9 | 0.06885 | | | 6.6 | 839 | | 17 | 789 | 7 | 972 | 61 | 19 |
| 1.2436 | 5.2 | 0.13014 | | | 1.6 | 0.06929 | | | 5.4 | 821 | | 15 | 789 | 6 | 906 | 55 | 13 |
| 1.2285 | 4.3 | 0.12972 | | | 1.2 | 0.06867 | | | 4.3 | 814 | | 12 | 786 | 5 | 888 | 45 | 11 |
| 1.3105 | 7.9 | 0.12957 | | | 2.2 | 0.07334 | | | 8.3 | 850 | | 23 | 785 | 8 | 1022 | 84 | 23 |
| 1.1734 | 3.3 | 0.12956 | | | 1.0 | 0.06567 | | | 3.5 | 788 | | 9 | 785 | 4 | 794 | 36 | 1 |
| 1.1951 | 4.9 | 0.12952 | | | 1.5 | 0.06691 | | | 5.0 | 798 | | 13 | 785 | 5 | 834 | 51 | 6 |
| 1.1875 | 7.5 | 0.12950 | | | 2.0 | 0.06649 | | | 7.9 | 795 | | 21 | 785 | 8 | 820 | 82 | 4 |
| 1.1703 | 5.4 | 0.12943 | | | 1.8 | 0.06556 | | | 5.7 | 787 | | 15 | 785 | 6 | 792 | 60 | 1 |
| 1.2318 | 3.8 | 0.12892 | | | 1.2 | 0.06928 | | | 4.0 | 815 | | 11 | 782 | 4 | 906 | 41 | 14 |
| 1.1926 | 7.1 | 0.12851 | | | 2.1 | 0.06729 | | | 7.4 | 797 | | 19 | 779 | 8 | 846 | 76 | 8 |
| 1.2092 | 3.0 | 0.12812 | | | 0.9 | 0.06844 | | | 3.1 | 805 | | 8 | 777 | 3 | 880 | 32 | 12 |
| 1.1745 | 3.3 | 0.12809 | | | 1.0 | 0.06649 | | | 3.4 | 789 | | 9 | 777 | 4 | 820 | 36 | 5 |
| 1.1220 | 5.5 | 0.12802 | | | 1.5 | 0.06355 | | | 5.7 | 764 | | 15 | 777 | 6 | 726 | 61 | -7 |
| 1.1954 | 4.0 | 0.12906 | | | 1.2 | 0.06716 | | | 4.0 | 801 | | 9 | 775 | 4 | 870 | 36 | 11 |
| 1.2162 | 8.1 | 0.12760 | | | 2.1 | 0.06911 | | | 8.4 | 808 | | 22 | 774 | 8 | 902 | 87 | 14 |
| 1.1437 | 5.0 | 0.12731 | | | 1.4 | 0.06514 | | | 4.9 | 774 | | 13 | 773 | 5 | 778 | 51 | 1 |
| 1.2123 | 3.9 | 0.12712 | | | 1.3 | 0.06915 | | | 4.2 | 806 | | 11 | 771 | 5 | 902 | 43 | 14 |
| 1.2386 | 7.3 | 0.12671 | | | 2.2 | 0.07088 | | | 7.6 | 818 | | 20 | 769 | 8 | 952 | 77 | 19 |
| 1.2290 | 5.8 | 0.12615 | | | 1.6 | 0.07064 | | | 6.4 | 814 | | 16 | 766 | 6 | 946 | 65 | 19 |
| 1.2170 | 1.7 | 0.12594 | | | 0.8 | 0.07007 | | | 1.6 | 808 | | 5 | 765 | 3 | 930 | 16 | 18 |
| 1.1583 | 7.0 | 0.12592 | | | 2.0 | 0.06670 | | | 7.6 | 781 | | 19 | 765 | 7 | 828 | 79 | 8 |
| 1.1726 | 5.8 | 0.12587 | | | 1.6 | 0.06755 | | | 5.9 | 788 | | 16 | 764 | 6 | 854 | 61 | 11 |
| 1.1630 | 4.8 | 0.12507 | | | 1.3 | 0.06743 | | | 5.0 | 783 | | 13 | 760 | 5 | 850 | 51 | 11 |
| 1.1413 | 4.2 | 0.12464 | | | 1.2 | 0.06640 | | | 4.5 | 773 | | 11 | 757 | 4 | 818 | 47 | 7 |
| 1.1317 | 3.5 | 0.12438 | | | 1.0 | 0.06598 | | | 3.6 | 769 | | 9 | 756 | 3 | 804 | 38 | 6 |
| 1.1688 | 2.8 | 0.12408 | | | 0.9 | 0.06830 | | | 3.0 | 786 | | 8 | 754 | 3 | 876 | 31 | 14 |
| 1.0842 | 5.8 | 0.11792 | | | 1.6 | 0.06668 | | | 6.1 | 769 | | 16 | 750 | 6 | 824 | 64 | 9 |
| 1.1383 | 3.9 | 0.12275 | | | 1.2 | 0.06724 | | | 4.0 | 772 | | 10 | 746 | 4 | 844 | 42 | 12 |
| 1.1794 | 4.3 | 0.12256 | | | 1.3 | 0.06978 | | | 4.5 | 791 | | 12 | 745 | 4 | 920 | 46 | 19 |
| **Ratios** | | | | | | | | | |  | **Ages** | | | | | | |
| 207Pb  235U | error (2s%) | 206Pb  238U | | | error (2s%) | 207Pb  206U | | | error  (2s%) | 207Pb  235U | | error  (1s abs) | 206Pb  238U | error  (1s abs) | 207Pb  206U | error  (1s abs) | % dis-cordance |
| 1.1316 | 4.1 | 0.12235 | | | 1.1 | 0.06706 | | | 4.2 | 769 | | 11 | 744 | 4 | 838 | 44 | 11 |
| 1.1518 | 10.4 | 0.12129 | | | 3.1 | 0.06886 | | | 10.7 | 778 | | 28 | 738 | 11 | 894 | 110 | 17 |
| 1.1523 | 6.0 | 0.12033 | | | 1.6 | 0.06944 | | | 6.0 | 777 | | 16 | 732 | 6 | 906 | 63 | 19 |
| 1.1223 | 7.8 | 0.11984 | | | 2.0 | 0.06791 | | | 8.1 | 764 | | 21 | 730 | 7 | 864 | 84 | 16 |
| 1.0744 | 7.5 | 0.11936 | | | 1.9 | 0.06527 | | | 7.7 | 741 | | 20 | 727 | 6 | 782 | 80 | 7 |
| 1.1323 | 4.5 | 0.12052 | | | 1.3 | 0.06813 | | | 4.6 | 762 | | 12 | 725 | 5 | 872 | 48 | 17 |
| 1.0765 | 7.4 | 0.11874 | | | 2.0 | 0.06574 | | | 7.9 | 742 | | 19 | 723 | 7 | 798 | 83 | 9 |
| 1.0379 | 5.8 | 0.11847 | | | 1.5 | 0.06353 | | | 6.2 | 723 | | 15 | 722 | 5 | 724 | 65 | 0 |
| 1.0419 | 5.5 | 0.11782 | | | 1.6 | 0.06412 | | | 5.4 | 731 | | 14 | 719 | 5 | 768 | 56 | 6 |
| 1.1175 | 3.4 | 0.11729 | | | 1.0 | 0.06909 | | | 3.6 | 762 | | 9 | 715 | 3 | 900 | 37 | 21 |
| 1.0759 | 4.4 | 0.11634 | | | 1.3 | 0.06706 | | | 4.5 | 742 | | 12 | 709 | 4 | 838 | 47 | 15 |
| 1.0790 | 5.8 | 0.11578 | | | 1.7 | 0.06757 | | | 6.2 | 743 | | 15 | 706 | 6 | 854 | 65 | 17 |
| 1.0395 | 6.3 | 0.10954 | | | 1.8 | 0.06881 | | | 6.3 | 724 | | 16 | 670 | 6 | 892 | 65 | 25 |
| 0.9850 | 4.7 | 0.10732 | | | 1.5 | 0.06655 | | | 4.8 | 696 | | 12 | 657 | 5 | 822 | 50 | 20 |
| 0.9681 | 7.3 | 0.10442 | | | 2.1 | 0.06722 | | | 7.0 | 687 | | 18 | 640 | 6 | 844 | 74 | 24 |
|  |  |  | | |  |  | | |  |  | |  |  |  |  |  |  |
| **Arkahawl and Marsham Formations (Mirbat)** | | | | | | | | |  |  | |  |  |  |  |  |  |
| 1.4431 | 3.7 | | 0.15618 | 1.1 | | | 0.06700 | | 3.9 | 907 | | 11 | 936 | 5 | 836 | 41 | -12 |
| 1.5506 | 5.2 | | 0.15445 | 1.5 | | | 0.07280 | | 5.5 | 951 | | 16 | 926 | 6 | 1008 | 55 | 8 |
| 1.5076 | 5.3 | | 0.15428 | 1.6 | | | 0.07086 | | 5.7 | 933 | | 16 | 925 | 7 | 952 | 58 | 3 |
| 1.4445 | 6.6 | | 0.14922 | 1.9 | | | 0.07019 | | 6.6 | 908 | | 20 | 897 | 8 | 934 | 68 | 4 |
| 1.4511 | 4.7 | | 0.14913 | 1.6 | | | 0.07056 | | 4.6 | 910 | | 14 | 896 | 6 | 944 | 47 | 5 |
| 1.4608 | 7.2 | | 0.14885 | 2.0 | | | 0.07116 | | 7.5 | 914 | | 22 | 895 | 8 | 962 | 77 | 7 |
| 1.3925 | 4.1 | | 0.14776 | 1.2 | | | 0.06834 | | 4.3 | 886 | | 12 | 888 | 5 | 878 | 45 | -1 |
| 1.4037 | 3.4 | | 0.14711 | 1.3 | | | 0.06919 | | 3.5 | 891 | | 10 | 885 | 5 | 904 | 35 | 2 |
| 1.5461 | 8.0 | | 0.14632 | 2.1 | | | 0.07662 | | 8.5 | 949 | | 25 | 880 | 9 | 1110 | 84 | 21 |
| 1.3951 | 4.4 | | 0.14625 | 1.2 | | | 0.06917 | | 4.3 | 887 | | 13 | 880 | 5 | 902 | 44 | 2 |
| 1.3595 | 5.9 | | 0.14578 | 1.6 | | | 0.06762 | | 6.4 | 872 | | 17 | 877 | 7 | 856 | 66 | -2 |
| 1.4653 | 3.9 | | 0.14548 | 1.3 | | | 0.07303 | | 4.2 | 916 | | 12 | 876 | 5 | 1014 | 43 | 14 |
| 1.3975 | 9.0 | | 0.14518 | 2.5 | | | 0.06980 | | 9.6 | 888 | | 27 | 874 | 10 | 922 | 98 | 5 |
| 1.3385 | 6.5 | | 0.14430 | 1.9 | | | 0.06726 | | 6.8 | 863 | | 19 | 869 | 8 | 844 | 71 | -3 |
| 1.3142 | 5.7 | | 0.14423 | 1.6 | | | 0.06607 | | 5.9 | 852 | | 16 | 869 | 7 | 808 | 62 | -7 |
| 1.3190 | 5.8 | | 0.14362 | 1.7 | | | 0.06660 | | 5.9 | 854 | | 17 | 865 | 7 | 824 | 61 | -5 |
| 1.3929 | 7.7 | | 0.14353 | 2.1 | | | 0.07037 | | 8.4 | 886 | | 23 | 865 | 8 | 938 | 86 | 8 |
| 1.3255 | 4.0 | | 0.14334 | 1.7 | | | 0.06705 | | 3.9 | 857 | | 12 | 863 | 7 | 838 | 40 | -3 |
| 1.3872 | 6.4 | | 0.14313 | 2.0 | | | 0.07028 | | 6.9 | 884 | | 19 | 862 | 8 | 936 | 70 | 8 |
| 1.3081 | 5.4 | | 0.14295 | 1.6 | | | 0.06635 | | 5.4 | 849 | | 15 | 861 | 6 | 816 | 56 | -6 |
| 1.3067 | 3.0 | | 0.14253 | 1.0 | | | 0.06648 | | 3.2 | 849 | | 9 | 859 | 4 | 820 | 34 | -5 |
| 1.4366 | 3.9 | | 0.14225 | 1.1 | | | 0.07323 | | 4.0 | 904 | | 12 | 857 | 4 | 1020 | 41 | 16 |
| 1.4091 | 6.6 | | 0.14200 | 1.8 | | | 0.07195 | | 6.9 | 893 | | 20 | 856 | 7 | 984 | 70 | 13 |
| 1.3481 | 4.0 | | 0.14193 | 1.1 | | | 0.06887 | | 4.1 | 867 | | 12 | 856 | 5 | 894 | 43 | 4 |
| 1.3149 | 6.8 | | 0.14136 | 1.9 | | | 0.06745 | | 6.5 | 852 | | 20 | 852 | 8 | 850 | 67 | 0 |
| 1.3211 | 6.0 | | 0.14091 | 1.7 | | | 0.06798 | | 6.4 | 855 | | 17 | 850 | 7 | 868 | 66 | 2 |
| 1.2835 | 9.5 | | 0.14089 | 2.7 | | | 0.06606 | | 10.2 | 838 | | 27 | 850 | 11 | 808 | 107 | -5 |
| 1.3058 | 4.2 | | 0.14087 | 1.4 | | | 0.06722 | | 4.2 | 848 | | 12 | 850 | 5 | 844 | 43 | -1 |
| 1.3108 | 5.6 | | 0.14072 | 1.4 | | | 0.06754 | | 5.7 | 850 | | 16 | 849 | 6 | 854 | 59 | 1 |
| 1.3501 | 8.0 | | 0.14064 | 2.3 | | | 0.06961 | | 8.4 | 868 | | 23 | 848 | 9 | 916 | 86 | 7 |
| 1.3787 | 4.6 | | 0.13967 | 1.2 | | | 0.07158 | | 4.7 | 880 | | 14 | 843 | 5 | 972 | 48 | 13 |
| 1.2893 | 3.0 | | 0.13961 | 1.1 | | | 0.06697 | | 3.1 | 841 | | 9 | 842 | 4 | 836 | 32 | -1 |
| 1.3593 | 4.1 | | 0.13920 | 1.3 | | | 0.07081 | | 4.2 | 872 | | 12 | 840 | 5 | 950 | 44 | 12 |
| 1.3048 | 4.1 | | 0.13908 | 1.3 | | | 0.06803 | | 4.2 | 848 | | 12 | 839 | 5 | 868 | 44 | 3 |
| 1.2726 | 5.6 | | 0.13907 | 1.5 | | | 0.06636 | | 5.7 | 834 | | 16 | 839 | 6 | 816 | 60 | -3 |
| 1.2849 | 5.1 | | 0.13902 | 1.5 | | | 0.06702 | | 5.1 | 839 | | 15 | 839 | 6 | 838 | 53 | 0 |
| 1.2628 | 3.8 | | 0.13840 | 1.2 | | | 0.06616 | | 3.8 | 829 | | 11 | 836 | 5 | 810 | 40 | -3 |
| 1.2281 | 10.1 | | 0.13834 | 2.5 | | | 0.06437 | | 11.2 | 813 | | 28 | 835 | 10 | 752 | 118 | -11 |
| 1.3159 | 7.5 | | 0.13823 | 2.0 | | | 0.06903 | | 8.1 | 853 | | 22 | 835 | 8 | 898 | 84 | 7 |
| **Ratios** | | | | | | | | | |  | **Ages** | | | | | | |
| 207Pb  235U | error (2s%) | | 206Pb  238U | error (2s%) | | | 207Pb  206U | | error  (2s%) | 207Pb  235U | | error  (1s abs) | 206Pb  238U | error  (1s abs) | 207Pb  206U | error  (1s abs) | % dis-cordance |
| 1.3184 | 2.7 | | 0.13796 | 0.9 | | | 0.06929 | | 2.8 | 854 | | 8 | 833 | 4 | 906 | 29 | 8 |
| 1.3447 | 4.3 | | 0.13795 | 1.4 | | | 0.07068 | | 4.5 | 865 | | 13 | 833 | 6 | 948 | 46 | 12 |
| 1.2706 | 4.6 | | 0.13746 | 1.2 | | | 0.06703 | | 4.7 | 833 | | 13 | 830 | 5 | 838 | 49 | 1 |
| 1.3049 | 4.0 | | 0.13716 | 1.2 | | | 0.06899 | | 4.0 | 848 | | 11 | 829 | 5 | 898 | 41 | 8 |
| 1.3013 | 3.7 | | 0.13693 | 1.2 | | | 0.06891 | | 3.9 | 846 | | 11 | 827 | 5 | 896 | 41 | 8 |
| 1.2342 | 4.4 | | 0.13539 | 1.3 | | | 0.06610 | | 4.7 | 816 | | 12 | 819 | 5 | 808 | 50 | -1 |
| 1.2845 | 3.5 | | 0.13521 | 1.1 | | | 0.06889 | | 3.6 | 839 | | 10 | 818 | 4 | 894 | 38 | 9 |
| 1.2330 | 3.8 | | 0.13427 | 1.1 | | | 0.06659 | | 4.1 | 816 | | 11 | 812 | 4 | 824 | 43 | 1 |
| 1.3439 | 4.2 | | 0.13384 | 1.3 | | | 0.07281 | | 4.3 | 865 | | 12 | 810 | 5 | 1008 | 43 | 20 |
| 1.2090 | 4.9 | | 0.13358 | 1.4 | | | 0.06563 | | 5.1 | 805 | | 14 | 808 | 5 | 794 | 53 | -2 |
| 1.2665 | 4.8 | | 0.13355 | 1.4 | | | 0.06876 | | 5.1 | 831 | | 14 | 808 | 5 | 890 | 52 | 9 |
| 1.2270 | 3.1 | | 0.13355 | 0.9 | | | 0.06662 | | 3.1 | 813 | | 9 | 808 | 4 | 824 | 33 | 2 |
| 1.2067 | 3.6 | | 0.13353 | 1.1 | | | 0.06553 | | 3.8 | 804 | | 10 | 808 | 4 | 790 | 40 | -2 |
| 1.2558 | 3.4 | | 0.13342 | 1.1 | | | 0.06825 | | 3.5 | 826 | | 10 | 807 | 4 | 876 | 36 | 8 |
| 1.1986 | 4.0 | | 0.13334 | 1.1 | | | 0.06519 | | 4.0 | 800 | | 11 | 807 | 4 | 780 | 42 | -3 |
| 1.2273 | 6.3 | | 0.13263 | 2.0 | | | 0.06710 | | 6.6 | 813 | | 18 | 803 | 7 | 840 | 68 | 4 |
| 1.2360 | 4.9 | | 0.13262 | 1.5 | | | 0.06758 | | 5.0 | 817 | | 14 | 803 | 6 | 854 | 52 | 6 |
| 1.2041 | 3.3 | | 0.13230 | 0.9 | | | 0.06599 | | 3.4 | 802 | | 9 | 801 | 3 | 806 | 35 | 1 |
| 1.1590 | 5.3 | | 0.13220 | 1.6 | | | 0.06357 | | 5.7 | 781 | | 15 | 800 | 6 | 726 | 61 | -10 |
| 1.3414 | 9.7 | | 0.13217 | 2.8 | | | 0.07359 | | 11.0 | 864 | | 28 | 800 | 10 | 1030 | 111 | 22 |
| 1.2146 | 6.3 | | 0.13183 | 1.7 | | | 0.06681 | | 6.5 | 807 | | 18 | 798 | 6 | 830 | 68 | 4 |
| 1.2825 | 3.3 | | 0.13161 | 0.9 | | | 0.07066 | | 3.5 | 838 | | 9 | 797 | 4 | 946 | 36 | 16 |
| 1.2470 | 3.5 | | 0.13156 | 1.1 | | | 0.06873 | | 3.7 | 822 | | 10 | 797 | 4 | 890 | 38 | 10 |
| 1.2336 | 3.2 | | 0.13139 | 1.1 | | | 0.06808 | | 3.3 | 816 | | 9 | 796 | 4 | 870 | 34 | 9 |
| 1.3159 | 3.6 | | 0.13120 | 1.4 | | | 0.07273 | | 3.7 | 853 | | 10 | 795 | 5 | 1006 | 38 | 21 |
| 1.2171 | 4.6 | | 0.13098 | 1.3 | | | 0.06738 | | 4.8 | 808 | | 13 | 793 | 5 | 848 | 50 | 6 |
| 1.1975 | 5.8 | | 0.13250 | 1.7 | | | 0.06554 | | 6.3 | 797 | | 15 | 793 | 6 | 806 | 59 | 2 |
| 1.2665 | 3.3 | | 0.13023 | 1.0 | | | 0.07052 | | 3.4 | 831 | | 9 | 789 | 4 | 942 | 36 | 16 |
| 1.2428 | 3.8 | | 0.12993 | 1.2 | | | 0.06936 | | 3.8 | 820 | | 11 | 787 | 4 | 908 | 40 | 13 |
| 1.2646 | 3.5 | | 0.12952 | 1.1 | | | 0.07080 | | 3.6 | 830 | | 10 | 785 | 4 | 950 | 37 | 17 |
| 1.2411 | 4.8 | | 0.12944 | 1.3 | | | 0.06953 | | 4.7 | 819 | | 13 | 785 | 5 | 914 | 49 | 14 |
| 1.1700 | 4.2 | | 0.12889 | 1.4 | | | 0.06582 | | 4.4 | 787 | | 12 | 782 | 5 | 800 | 47 | 2 |
| 1.1683 | 4.1 | | 0.12857 | 1.4 | | | 0.06589 | | 4.1 | 786 | | 11 | 780 | 5 | 802 | 43 | 3 |
| 1.2160 | 3.4 | | 0.12842 | 1.0 | | | 0.06866 | | 3.5 | 808 | | 9 | 779 | 4 | 888 | 37 | 12 |
| 1.1170 | 6.2 | | 0.12831 | 1.7 | | | 0.06312 | | 6.4 | 762 | | 17 | 778 | 6 | 712 | 68 | -9 |
| 1.1486 | 4.3 | | 0.12753 | 1.2 | | | 0.06531 | | 4.3 | 777 | | 12 | 774 | 4 | 784 | 45 | 1 |
| 1.1537 | 5.3 | | 0.12724 | 1.4 | | | 0.06575 | | 5.5 | 779 | | 14 | 772 | 5 | 798 | 58 | 3 |
| 1.1773 | 3.7 | | 0.12600 | 1.4 | | | 0.06775 | | 3.9 | 790 | | 10 | 765 | 5 | 860 | 40 | 11 |
| 1.1793 | 3.7 | | 0.12526 | 1.3 | | | 0.06826 | | 3.9 | 791 | | 10 | 761 | 5 | 876 | 39 | 13 |
| 1.1842 | 3.7 | | 0.12522 | 1.1 | | | 0.06858 | | 3.8 | 793 | | 10 | 761 | 4 | 886 | 40 | 14 |
| 1.1142 | 8.5 | | 0.12405 | 2.0 | | | 0.06513 | | 8.9 | 760 | | 23 | 754 | 7 | 778 | 94 | 3 |
| 1.1440 | 6.7 | | 0.12346 | 2.0 | | | 0.06719 | | 7.0 | 774 | | 18 | 750 | 7 | 842 | 73 | 11 |
| 1.1687 | 4.0 | | 0.12312 | 1.2 | | | 0.06883 | | 4.1 | 786 | | 11 | 748 | 4 | 892 | 42 | 16 |
| 1.2281 | 3.9 | | 0.12305 | 1.2 | | | 0.07237 | | 4.0 | 813 | | 11 | 748 | 4 | 996 | 41 | 25 |
| 1.1381 | 4.4 | | 0.12270 | 1.5 | | | 0.06726 | | 4.1 | 772 | | 12 | 746 | 5 | 844 | 43 | 12 |
| 1.1485 | 2.7 | | 0.12228 | 1.0 | | | 0.06811 | | 2.6 | 777 | | 7 | 744 | 4 | 870 | 27 | 15 |
| 1.1003 | 3.9 | | 0.11981 | 1.4 | | | 0.06659 | | 4.2 | 753 | | 10 | 729 | 5 | 824 | 44 | 11 |
| 1.1007 | 2.3 | | 0.11730 | 0.9 | | | 0.06804 | | 2.2 | 754 | | 6 | 715 | 3 | 868 | 23 | 18 |
| 1.0778 | 4.1 | | 0.11637 | 1.1 | | | 0.06715 | | 4.1 | 743 | | 11 | 710 | 4 | 842 | 43 | 16 |
| 1.0641 | 5.9 | | 0.11655 | 1.6 | | | 0.06621 | | 6.5 | 729 | | 15 | 702 | 5 | 812 | 67 | 14 |
| 1.0741 | 2.9 | | 0.11293 | 1.2 | | | 0.06897 | | 2.9 | 741 | | 8 | 690 | 4 | 896 | 30 | 23 |
| 0.9961 | 6.0 | | 0.10822 | 1.7 | | | 0.06674 | | 6.5 | 699 | | 15 | 656 | 5 | 838 | 70 | 22 |
|  |  | |  |  | | |  | |  |  | |  |  |  |  |  |  |
|  |  | |  |  | | |  | |  |  | |  |  |  |  |  |  |
|  |  | |  |  | | |  | |  |  | |  |  |  |  |  |  |
|  |  | |  |  | | |  | |  |  | |  |  |  |  |  |  |
| **Ratios** | | | | | | | | | |  | **Ages** | | | | | | |
| 207Pb  235U | error (2s%) | | 206Pb  238U | error (2s%) | | | 207Pb  206U | | error  (2s%) | 207Pb  235U | | error  (1s abs) | 206Pb  238U | error  (1s abs) | 207Pb  206U | error  (1s abs) | % dis-cordance |
| **Shareef Formation (Mirbat)** | | | |  | | |  | |  |  | |  |  |  |  |  |  |
| 1.5709 | 17.9 | | 0.17186 | 8.8 | | | 0.06682 | | 18.9 | 959 | | 55 | 1022 | 41 | 832 | 99 | -23 |
| 1.5239 | 11.5 | | 0.17001 | 3.3 | | | 0.06752 | | 10.8 | 940 | | 35 | 1012 | 15 | 854 | 112 | -19 |
| 1.8440 | 8.6 | | 0.16791 | 3.4 | | | 0.08103 | | 7.5 | 1061 | | 28 | 1001 | 16 | 1222 | 74 | 18 |
| 1.5923 | 6.3 | | 0.16775 | 2.7 | | | 0.06982 | | 6.2 | 967 | | 20 | 1000 | 12 | 923 | 64 | -8 |
| 1.5487 | 7.1 | | 0.16210 | 6.8 | | | 0.06731 | | 13.2 | 950 | | 22 | 968 | 31 | 847 | 138 | -14 |
| 1.5676 | 4.6 | | 0.16134 | 2.8 | | | 0.07014 | | 4.3 | 957 | | 14 | 964 | 12 | 932 | 44 | -3 |
| 1.6505 | 11.7 | | 0.16043 | 7.6 | | | 0.07845 | | 11.0 | 990 | | 37 | 959 | 34 | 1158 | 109 | 17 |
| 1.5728 | 5.5 | | 0.15924 | 3.2 | | | 0.07220 | | 5.3 | 960 | | 17 | 953 | 14 | 992 | 53 | 4 |
| 1.6455 | 6.4 | | 0.15834 | 3.3 | | | 0.07594 | | 6.2 | 988 | | 20 | 948 | 14 | 1094 | 62 | 13 |
| 1.4884 | 5.6 | | 0.15813 | 3.2 | | | 0.06807 | | 5.3 | 926 | | 17 | 946 | 14 | 871 | 55 | -9 |
| 1.5194 | 8.0 | | 0.15669 | 3.4 | | | 0.07116 | | 7.1 | 938 | | 25 | 938 | 15 | 962 | 72 | 2 |
| 1.4188 | 8.2 | | 0.15459 | 3.5 | | | 0.06606 | | 6.6 | 897 | | 25 | 927 | 15 | 808 | 69 | -15 |
| 1.4851 | 3.0 | | 0.15418 | 1.5 | | | 0.07018 | | 2.7 | 924 | | 9 | 924 | 7 | 934 | 28 | 1 |
| 1.3891 | 6.2 | | 0.15407 | 2.5 | | | 0.06739 | | 5.1 | 884 | | 18 | 924 | 11 | 850 | 53 | -9 |
| 1.3599 | 7.1 | | 0.15407 | 4.1 | | | 0.06539 | | 4.9 | 872 | | 21 | 924 | 18 | 787 | 52 | -17 |
| 1.3865 | 6.1 | | 0.15358 | 3.9 | | | 0.06593 | | 5.1 | 883 | | 18 | 921 | 17 | 804 | 53 | -15 |
| 1.4868 | 5.6 | | 0.15317 | 4.2 | | | 0.07057 | | 5.4 | 925 | | 17 | 919 | 18 | 945 | 55 | 3 |
| 1.3771 | 11.0 | | 0.15311 | 5.5 | | | 0.06742 | | 12.1 | 879 | | 32 | 918 | 24 | 851 | 126 | -8 |
| 1.5149 | 6.6 | | 0.15309 | 4.0 | | | 0.07055 | | 6.4 | 936 | | 20 | 918 | 17 | 944 | 65 | 3 |
| 1.5598 | 10.3 | | 0.15306 | 3.5 | | | 0.07217 | | 10.9 | 954 | | 32 | 918 | 15 | 991 | 111 | 7 |
| 1.3726 | 5.8 | | 0.15300 | 2.5 | | | 0.06601 | | 4.9 | 877 | | 17 | 918 | 10 | 807 | 51 | -14 |
| 1.4483 | 5.5 | | 0.15288 | 3.1 | | | 0.06934 | | 4.5 | 909 | | 17 | 917 | 13 | 909 | 47 | -1 |
| 1.4301 | 13.9 | | 0.15277 | 6.2 | | | 0.06989 | | 14.5 | 902 | | 41 | 916 | 26 | 925 | 149 | 1 |
| 1.3253 | 2.3 | | 0.15217 | 3.6 | | | 0.06420 | | 2.5 | 857 | | 7 | 913 | 15 | 748 | 27 | -22 |
| 1.2905 | 17.5 | | 0.15216 | 5.8 | | | 0.06495 | | 16.6 | 842 | | 50 | 913 | 25 | 773 | 175 | -18 |
| 1.3956 | 8.4 | | 0.15195 | 3.5 | | | 0.06634 | | 8.2 | 887 | | 25 | 912 | 15 | 817 | 85 | -12 |
| 1.4425 | 13.9 | | 0.15161 | 6.3 | | | 0.06839 | | 12.2 | 907 | | 42 | 910 | 27 | 880 | 127 | -3 |
| 1.4406 | 6.2 | | 0.15159 | 3.1 | | | 0.06902 | | 5.1 | 906 | | 19 | 910 | 13 | 899 | 52 | -1 |
| 1.6923 | 14.7 | | 0.15158 | 5.3 | | | 0.08055 | | 13.8 | 1006 | | 47 | 910 | 22 | 1211 | 136 | 25 |
| 1.4422 | 5.9 | | 0.15082 | 2.9 | | | 0.06964 | | 5.7 | 907 | | 18 | 906 | 12 | 918 | 58 | 1 |
| 1.3695 | 10.8 | | 0.15024 | 4.4 | | | 0.06463 | | 11.0 | 876 | | 32 | 902 | 18 | 762 | 116 | -18 |
| 1.3282 | 13.9 | | 0.15010 | 4.6 | | | 0.06406 | | 14.6 | 858 | | 40 | 902 | 19 | 744 | 155 | -21 |
| 1.4586 | 5.8 | | 0.14973 | 3.7 | | | 0.07078 | | 3.9 | 913 | | 17 | 899 | 15 | 951 | 40 | 5 |
| 1.3620 | 2.6 | | 0.14972 | 1.2 | | | 0.06589 | | 2.4 | 873 | | 8 | 899 | 5 | 803 | 25 | -12 |
| 1.3363 | 8.8 | | 0.14966 | 5.7 | | | 0.06434 | | 9.9 | 862 | | 25 | 899 | 24 | 753 | 105 | -19 |
| 1.2998 | 8.3 | | 0.14956 | 2.9 | | | 0.06368 | | 7.7 | 846 | | 24 | 899 | 12 | 731 | 81 | -23 |
| 1.3422 | 7.2 | | 0.14943 | 3.0 | | | 0.06573 | | 6.7 | 864 | | 21 | 898 | 12 | 798 | 70 | -13 |
| 1.4262 | 9.0 | | 0.14931 | 3.0 | | | 0.06885 | | 8.8 | 900 | | 27 | 897 | 13 | 894 | 46 | 0 |
| 1.3602 | 7.4 | | 0.14913 | 2.8 | | | 0.06668 | | 7.1 | 872 | | 22 | 896 | 12 | 828 | 74 | -8 |
| 1.2918 | 11.3 | | 0.14886 | 3.6 | | | 0.06357 | | 9.6 | 842 | | 32 | 895 | 15 | 727 | 102 | -23 |
| 1.4121 | 15.3 | | 0.14863 | 5.6 | | | 0.06817 | | 13.7 | 894 | | 46 | 893 | 24 | 874 | 142 | -2 |
| 1.2837 | 9.3 | | 0.14849 | 4.6 | | | 0.06312 | | 9.8 | 839 | | 26 | 892 | 19 | 712 | 104 | -25 |
| 1.3634 | 4.9 | | 0.14847 | 2.5 | | | 0.06672 | | 3.9 | 873 | | 14 | 892 | 10 | 829 | 41 | -8 |
| 1.3938 | 4.6 | | 0.14833 | 2.6 | | | 0.06741 | | 4.6 | 886 | | 14 | 892 | 11 | 850 | 48 | -5 |
| 1.4079 | 6.8 | | 0.14808 | 2.8 | | | 0.06831 | | 6.4 | 892 | | 20 | 890 | 12 | 878 | 66 | -1 |
| 1.4806 | 6.9 | | 0.14804 | 3.0 | | | 0.07238 | | 6.5 | 922 | | 21 | 890 | 13 | 997 | 66 | 11 |
| 1.3670 | 5.5 | | 0.14802 | 2.9 | | | 0.06680 | | 4.0 | 875 | | 16 | 890 | 12 | 831 | 42 | -7 |
| 1.3478 | 6.1 | | 0.14795 | 4.1 | | | 0.06603 | | 4.7 | 867 | | 18 | 889 | 17 | 807 | 49 | -10 |
| 1.3938 | 7.9 | | 0.14785 | 4.3 | | | 0.06742 | | 6.9 | 886 | | 23 | 889 | 18 | 851 | 72 | -4 |
| 1.3410 | 9.3 | | 0.14773 | 4.0 | | | 0.06588 | | 9.1 | 864 | | 27 | 888 | 17 | 803 | 96 | -11 |
| 1.3792 | 14.6 | | 0.14772 | 6.8 | | | 0.06802 | | 10.6 | 880 | | 43 | 888 | 28 | 869 | 109 | -2 |
| 1.3583 | 9.3 | | 0.14751 | 3.5 | | | 0.06675 | | 7.8 | 871 | | 27 | 887 | 15 | 830 | 81 | -7 |
| 1.3884 | 3.0 | | 0.14746 | 0.9 | | | 0.06837 | | 2.9 | 884 | | 9 | 887 | 4 | 880 | 30 | -1 |
| 1.3231 | 5.5 | | 0.14743 | 3.3 | | | 0.06454 | | 5.0 | 856 | | 16 | 887 | 14 | 759 | 53 | -17 |
| 1.3155 | 3.8 | | 0.14729 | 3.3 | | | 0.06443 | | 3.3 | 853 | | 11 | 886 | 14 | 756 | 35 | -17 |
| **Ratios** | | | | | | | | | |  | **Ages** | | | | | | |
| 207Pb  235U | error (2s%) | | 206Pb  238U | error (2s%) | | | 207Pb  206U | | error  (2s%) | 207Pb  235U | | error  (1s abs) | 206Pb  238U | error  (1s abs) | 207Pb  206U | error  (1s abs) | % dis-cordance |
| 1.4267 | 7.6 | | 0.14724 | 3.3 | | | 0.07043 | | 7.7 | 900 | | 23 | 885 | 14 | 941 | 79 | 6 |
| 1.2715 | 11.2 | | 0.14700 | 3.6 | | | 0.06356 | | 10.0 | 833 | | 32 | 884 | 15 | 727 | 106 | -22 |
| 1.3121 | 6.9 | | 0.14687 | 5.0 | | | 0.06376 | | 7.1 | 851 | | 20 | 883 | 21 | 734 | 75 | -20 |
| 1.3657 | 12.8 | | 0.14659 | 6.4 | | | 0.07109 | | 11.6 | 874 | | 38 | 882 | 27 | 960 | 119 | 8 |
| 1.3765 | 5.8 | | 0.14647 | 2.7 | | | 0.06854 | | 3.5 | 879 | | 17 | 881 | 11 | 885 | 37 | 0 |
| 1.3515 | 9.0 | | 0.14632 | 4.3 | | | 0.06597 | | 8.0 | 868 | | 26 | 880 | 18 | 806 | 83 | -9 |
| 1.3697 | 7.0 | | 0.14624 | 3.0 | | | 0.06765 | | 6.0 | 876 | | 20 | 880 | 12 | 858 | 62 | -3 |
| 1.3267 | 5.5 | | 0.14618 | 4.3 | | | 0.06547 | | 4.3 | 857 | | 16 | 880 | 18 | 789 | 45 | -11 |
| 1.4588 | 9.0 | | 0.14616 | 4.4 | | | 0.07234 | | 8.0 | 914 | | 27 | 879 | 18 | 996 | 81 | 12 |
| 1.3001 | 6.0 | | 0.14603 | 2.8 | | | 0.06526 | | 5.8 | 846 | | 17 | 879 | 12 | 783 | 61 | -12 |
| 1.3890 | 5.3 | | 0.14593 | 3.5 | | | 0.06973 | | 5.8 | 884 | | 16 | 878 | 15 | 920 | 60 | 5 |
| 1.3166 | 3.4 | | 0.14571 | 1.2 | | | 0.06543 | | 3.3 | 853 | | 10 | 877 | 5 | 788 | 35 | -11 |
| 1.2675 | 12.7 | | 0.14569 | 6.0 | | | 0.06388 | | 12.0 | 831 | | 36 | 877 | 25 | 738 | 127 | -19 |
| 1.3357 | 8.9 | | 0.14567 | 4.4 | | | 0.06665 | | 7.1 | 861 | | 26 | 877 | 18 | 827 | 74 | -6 |
| 1.3812 | 13.2 | | 0.14559 | 3.3 | | | 0.06934 | | 11.3 | 881 | | 39 | 876 | 14 | 909 | 117 | 4 |
| 1.3969 | 4.5 | | 0.14555 | 2.9 | | | 0.07160 | | 3.1 | 888 | | 13 | 876 | 12 | 975 | 32 | 10 |
| 1.3433 | 3.7 | | 0.14545 | 3.2 | | | 0.06689 | | 6.0 | 865 | | 11 | 875 | 13 | 834 | 63 | -5 |
| 1.3662 | 7.1 | | 0.14545 | 3.6 | | | 0.06709 | | 7.1 | 875 | | 21 | 875 | 15 | 841 | 74 | -4 |
| 1.5498 | 8.0 | | 0.14534 | 3.9 | | | 0.07566 | | 7.6 | 950 | | 25 | 875 | 16 | 1086 | 76 | 19 |
| 1.3809 | 7.0 | | 0.14508 | 3.8 | | | 0.06842 | | 6.1 | 881 | | 20 | 873 | 16 | 881 | 63 | 1 |
| 1.3828 | 5.0 | | 0.14483 | 3.2 | | | 0.06987 | | 4.4 | 882 | | 15 | 872 | 13 | 924 | 46 | 6 |
| 1.4695 | 12.6 | | 0.14467 | 5.0 | | | 0.07888 | | 10.5 | 918 | | 38 | 871 | 20 | 1169 | 104 | 25 |
| 1.3185 | 3.4 | | 0.14459 | 2.6 | | | 0.06640 | | 2.3 | 854 | | 10 | 871 | 11 | 819 | 24 | -6 |
| 1.3055 | 9.4 | | 0.14449 | 3.2 | | | 0.06636 | | 6.8 | 848 | | 27 | 870 | 13 | 818 | 71 | -6 |
| 1.3254 | 8.1 | | 0.14430 | 3.5 | | | 0.06774 | | 7.1 | 857 | | 24 | 869 | 14 | 861 | 74 | -1 |
| 1.2435 | 12.5 | | 0.14424 | 3.1 | | | 0.06313 | | 11.1 | 820 | | 35 | 869 | 13 | 713 | 118 | -22 |
| 1.2218 | 19.0 | | 0.14404 | 5.1 | | | 0.06518 | | 18.8 | 811 | | 53 | 867 | 21 | 780 | 198 | -11 |
| 1.4825 | 5.0 | | 0.14384 | 5.1 | | | 0.07248 | | 5.1 | 923 | | 15 | 866 | 21 | 999 | 52 | 13 |
| 1.2807 | 5.8 | | 0.14383 | 3.8 | | | 0.06640 | | 3.2 | 837 | | 17 | 866 | 16 | 819 | 33 | -6 |
| 1.3166 | 6.1 | | 0.14381 | 3.4 | | | 0.06793 | | 4.0 | 853 | | 18 | 866 | 14 | 866 | 41 | 0 |
| 1.3335 | 9.4 | | 0.14377 | 5.2 | | | 0.06725 | | 7.5 | 860 | | 27 | 866 | 21 | 845 | 78 | -2 |
| 1.3099 | 5.9 | | 0.14361 | 3.3 | | | 0.06584 | | 3.8 | 850 | | 17 | 865 | 13 | 801 | 40 | -8 |
| 1.3706 | 12.8 | | 0.14355 | 6.0 | | | 0.06737 | | 12.7 | 876 | | 38 | 865 | 24 | 849 | 132 | -2 |
| 1.2757 | 9.5 | | 0.14348 | 4.2 | | | 0.06578 | | 9.1 | 835 | | 27 | 864 | 17 | 799 | 96 | -8 |
| 1.4356 | 7.3 | | 0.14333 | 3.9 | | | 0.07332 | | 6.5 | 904 | | 22 | 863 | 16 | 1023 | 66 | 16 |
| 1.3679 | 6.6 | | 0.14317 | 2.9 | | | 0.07083 | | 5.5 | 875 | | 20 | 863 | 12 | 953 | 56 | 9 |
| 1.2694 | 10.8 | | 0.14315 | 4.7 | | | 0.06516 | | 9.9 | 832 | | 31 | 862 | 19 | 780 | 104 | -11 |
| 1.2519 | 5.5 | | 0.14306 | 2.2 | | | 0.06391 | | 5.2 | 824 | | 16 | 862 | 9 | 739 | 56 | -17 |
| 1.3405 | 7.7 | | 0.14297 | 2.7 | | | 0.06844 | | 8.1 | 863 | | 22 | 861 | 11 | 882 | 84 | 2 |
| 1.3550 | 10.9 | | 0.14282 | 4.1 | | | 0.07007 | | 10.5 | 870 | | 32 | 861 | 17 | 930 | 54 | 8 |
| 1.2933 | 9.6 | | 0.14277 | 4.0 | | | 0.06818 | | 6.5 | 843 | | 28 | 860 | 16 | 874 | 68 | 2 |
| 1.4202 | 7.7 | | 0.14267 | 2.7 | | | 0.07214 | | 6.8 | 897 | | 23 | 860 | 11 | 990 | 69 | 13 |
| 1.4756 | 9.1 | | 0.14263 | 4.8 | | | 0.07693 | | 8.2 | 920 | | 27 | 860 | 19 | 1119 | 81 | 23 |
| 1.3459 | 4.6 | | 0.14244 | 2.7 | | | 0.06899 | | 3.7 | 866 | | 13 | 858 | 11 | 898 | 39 | 4 |
| 1.2343 | 18.3 | | 0.14243 | 8.1 | | | 0.06311 | | 15.3 | 816 | | 51 | 858 | 33 | 712 | 163 | -21 |
| 1.4478 | 13.2 | | 0.14194 | 5.2 | | | 0.07306 | | 12.5 | 909 | | 39 | 856 | 21 | 1016 | 127 | 16 |
| 1.3111 | 5.8 | | 0.14175 | 5.0 | | | 0.06504 | | 5.4 | 851 | | 17 | 855 | 20 | 776 | 57 | -10 |
| 1.2729 | 14.9 | | 0.14159 | 9.3 | | | 0.06509 | | 13.7 | 834 | | 42 | 854 | 37 | 777 | 144 | -10 |
| 1.2740 | 9.0 | | 0.14155 | 4.5 | | | 0.06487 | | 8.7 | 834 | | 26 | 853 | 18 | 770 | 91 | -11 |
| 1.2824 | 6.8 | | 0.14154 | 3.9 | | | 0.06586 | | 6.0 | 838 | | 19 | 853 | 16 | 802 | 63 | -6 |
| 1.2701 | 5.4 | | 0.14116 | 3.8 | | | 0.06407 | | 4.5 | 832 | | 15 | 851 | 15 | 744 | 47 | -14 |
| 1.2702 | 5.2 | | 0.14100 | 3.5 | | | 0.06480 | | 4.6 | 832 | | 15 | 850 | 14 | 768 | 49 | -11 |
| 1.3531 | 6.2 | | 0.14097 | 3.7 | | | 0.06804 | | 5.6 | 869 | | 18 | 850 | 15 | 870 | 58 | 2 |
| 1.3005 | 13.2 | | 0.14095 | 9.8 | | | 0.06484 | | 13.0 | 846 | | 38 | 850 | 39 | 769 | 137 | -11 |
| 1.5301 | 7.8 | | 0.14084 | 4.9 | | | 0.07627 | | 7.2 | 943 | | 24 | 849 | 20 | 1102 | 72 | 23 |
| 1.4243 | 14.4 | | 0.14069 | 4.5 | | | 0.07596 | | 14.1 | 899 | | 43 | 849 | 18 | 1094 | 141 | 22 |
| **Ratios** | | | | | | | | | |  | **Ages** | | | | | | |
| 207Pb  235U | error (2s%) | | 206Pb  238U | error (2s%) | | | 207Pb  206U | | error  (2s%) | 207Pb  235U | | error  (1s abs) | 206Pb  238U | error  (1s abs) | 207Pb  206U | error  (1s abs) | % dis-cordance |
| 1.2987 | 5.0 | | 0.14049 | 2.4 | | | 0.06791 | | 4.2 | 845 | | 14 | 847 | 9 | 866 | 44 | 2 |
| 1.4474 | 7.5 | | 0.14037 | 3.1 | | | 0.07389 | | 6.9 | 909 | | 23 | 847 | 12 | 1039 | 70 | 18 |
| 1.3127 | 6.0 | | 0.13956 | 2.6 | | | 0.06898 | | 6.2 | 851 | | 17 | 842 | 10 | 898 | 64 | 6 |
| 1.4584 | 12.8 | | 0.13954 | 6.6 | | | 0.07713 | | 12.5 | 913 | | 38 | 842 | 26 | 1125 | 125 | 25 |
| 1.4777 | 13.9 | | 0.13921 | 3.7 | | | 0.07664 | | 12.5 | 921 | | 42 | 840 | 15 | 1112 | 125 | 24 |
| 1.3141 | 4.4 | | 0.13915 | 4.3 | | | 0.06768 | | 3.8 | 852 | | 13 | 840 | 17 | 859 | 40 | 2 |
| 1.2985 | 14.1 | | 0.13868 | 7.1 | | | 0.06810 | | 11.6 | 845 | | 40 | 837 | 28 | 871 | 121 | 4 |
| 1.2209 | 5.5 | | 0.13845 | 4.8 | | | 0.06417 | | 4.5 | 810 | | 15 | 836 | 19 | 747 | 48 | -12 |
| 1.3442 | 15.6 | | 0.13842 | 6.5 | | | 0.07154 | | 15.6 | 865 | | 45 | 836 | 26 | 973 | 159 | 14 |
| 1.1772 | 6.2 | | 0.13833 | 3.5 | | | 0.06319 | | 4.0 | 790 | | 17 | 835 | 14 | 715 | 43 | -17 |
| 1.4004 | 8.9 | | 0.13816 | 3.7 | | | 0.07292 | | 8.7 | 889 | | 26 | 834 | 15 | 1012 | 88 | 18 |
| 1.2122 | 18.8 | | 0.13806 | 6.0 | | | 0.06369 | | 14.6 | 806 | | 52 | 834 | 23 | 731 | 154 | -14 |
| 1.2962 | 6.3 | | 0.13799 | 2.6 | | | 0.06855 | | 5.9 | 844 | | 18 | 833 | 10 | 885 | 61 | 6 |
| 1.2805 | 15.8 | | 0.13794 | 5.9 | | | 0.06845 | | 13.4 | 837 | | 45 | 833 | 23 | 882 | 138 | 6 |
| 1.3306 | 4.0 | | 0.13794 | 3.5 | | | 0.06941 | | 3.7 | 859 | | 12 | 833 | 14 | 911 | 38 | 9 |
| 1.3801 | 12.2 | | 0.13778 | 5.0 | | | 0.07098 | | 10.8 | 880 | | 36 | 832 | 19 | 957 | 55 | 13 |
| 1.4202 | 3.8 | | 0.13775 | 3.4 | | | 0.07482 | | 3.4 | 897 | | 11 | 832 | 13 | 1064 | 34 | 22 |
| 1.2370 | 10.2 | | 0.13771 | 2.6 | | | 0.06831 | | 7.3 | 818 | | 29 | 832 | 10 | 878 | 75 | 5 |
| 1.2545 | 15.0 | | 0.13769 | 5.1 | | | 0.06607 | | 14.4 | 825 | | 42 | 832 | 20 | 808 | 151 | -3 |
| 1.2153 | 6.0 | | 0.13762 | 2.7 | | | 0.06552 | | 5.1 | 808 | | 17 | 831 | 10 | 791 | 53 | -5 |
| 1.2468 | 6.1 | | 0.13749 | 5.2 | | | 0.06602 | | 4.1 | 822 | | 17 | 830 | 20 | 807 | 42 | -3 |
| 1.4374 | 9.4 | | 0.13713 | 8.5 | | | 0.07636 | | 8.9 | 905 | | 28 | 828 | 33 | 1105 | 89 | 25 |
| 1.3160 | 9.1 | | 0.13695 | 3.5 | | | 0.07006 | | 9.3 | 853 | | 26 | 827 | 14 | 930 | 96 | 11 |
| 1.3106 | 9.8 | | 0.13687 | 3.9 | | | 0.07136 | | 8.8 | 850 | | 28 | 827 | 15 | 968 | 90 | 15 |
| 1.2451 | 17.6 | | 0.13680 | 6.9 | | | 0.06388 | | 14.4 | 821 | | 49 | 827 | 27 | 738 | 152 | -12 |
| 1.3019 | 8.5 | | 0.13667 | 2.8 | | | 0.06913 | | 7.6 | 847 | | 25 | 826 | 11 | 903 | 78 | 9 |
| 1.1953 | 4.4 | | 0.13640 | 3.4 | | | 0.06263 | | 3.2 | 798 | | 12 | 824 | 13 | 696 | 34 | -19 |
| 1.2367 | 11.5 | | 0.13637 | 5.1 | | | 0.06706 | | 9.5 | 817 | | 32 | 824 | 20 | 840 | 99 | 2 |
| 1.2693 | 5.9 | | 0.13633 | 5.1 | | | 0.06684 | | 4.3 | 832 | | 17 | 824 | 20 | 833 | 45 | 1 |
| 1.3238 | 4.3 | | 0.13591 | 6.2 | | | 0.06976 | | 7.9 | 856 | | 12 | 821 | 24 | 921 | 82 | 11 |
| 1.2573 | 11.7 | | 0.13584 | 7.3 | | | 0.06437 | | 11.8 | 827 | | 33 | 821 | 28 | 754 | 125 | -9 |
| 1.2058 | 9.7 | | 0.13578 | 4.1 | | | 0.06444 | | 8.0 | 803 | | 27 | 821 | 16 | 756 | 84 | -9 |
| 1.3225 | 8.4 | | 0.13534 | 3.9 | | | 0.07043 | | 8.5 | 856 | | 24 | 818 | 15 | 941 | 87 | 13 |
| 1.3722 | 15.4 | | 0.13509 | 4.2 | | | 0.07509 | | 16.1 | 877 | | 45 | 817 | 16 | 1071 | 161 | 24 |
| 1.2524 | 10.6 | | 0.13506 | 4.7 | | | 0.06755 | | 10.5 | 824 | | 30 | 817 | 18 | 855 | 109 | 4 |
| 1.2780 | 14.1 | | 0.13490 | 5.4 | | | 0.06848 | | 14.4 | 836 | | 40 | 816 | 21 | 883 | 148 | 8 |
| 1.1991 | 15.4 | | 0.13473 | 6.4 | | | 0.06469 | | 11.6 | 800 | | 43 | 815 | 25 | 764 | 122 | -7 |
| 1.2045 | 5.8 | | 0.13458 | 3.6 | | | 0.06565 | | 4.0 | 803 | | 16 | 814 | 14 | 795 | 42 | -2 |
| 1.3888 | 6.8 | | 0.13454 | 3.8 | | | 0.07410 | | 6.7 | 884 | | 20 | 814 | 14 | 1044 | 67 | 22 |
| 1.1806 | 10.2 | | 0.13441 | 4.6 | | | 0.06394 | | 8.4 | 792 | | 28 | 813 | 17 | 740 | 89 | -10 |
| 1.2369 | 8.1 | | 0.13426 | 4.6 | | | 0.06652 | | 8.2 | 817 | | 23 | 812 | 18 | 823 | 85 | 1 |
| 1.2686 | 17.9 | | 0.13361 | 5.8 | | | 0.06900 | | 15.6 | 832 | | 51 | 808 | 22 | 899 | 161 | 10 |
| 1.3503 | 14.2 | | 0.13361 | 6.1 | | | 0.07308 | | 15.7 | 868 | | 42 | 808 | 23 | 1016 | 159 | 20 |
| 1.1797 | 17.8 | | 0.13327 | 7.5 | | | 0.06584 | | 19.3 | 791 | | 49 | 807 | 29 | 801 | 101 | -1 |
| 1.2361 | 5.5 | | 0.13251 | 2.5 | | | 0.06833 | | 5.4 | 817 | | 15 | 802 | 9 | 879 | 56 | 9 |
| 1.2141 | 7.1 | | 0.13243 | 4.1 | | | 0.06527 | | 5.8 | 807 | | 20 | 802 | 15 | 783 | 61 | -2 |
| 1.2229 | 6.2 | | 0.13237 | 3.3 | | | 0.06638 | | 5.5 | 811 | | 17 | 801 | 13 | 818 | 57 | 2 |
| 1.3143 | 8.9 | | 0.13217 | 5.3 | | | 0.07211 | | 7.9 | 852 | | 26 | 800 | 20 | 989 | 81 | 19 |
| 1.1154 | 11.1 | | 0.13181 | 4.2 | | | 0.06101 | | 11.0 | 761 | | 30 | 798 | 16 | 640 | 118 | -25 |
| 1.1455 | 15.1 | | 0.13176 | 5.5 | | | 0.06451 | | 13.6 | 775 | | 41 | 798 | 21 | 758 | 143 | -5 |
| 1.2766 | 10.5 | | 0.13173 | 3.9 | | | 0.07045 | | 9.9 | 835 | | 30 | 798 | 15 | 941 | 102 | 15 |
| 1.3084 | 5.4 | | 0.13148 | 4.2 | | | 0.07011 | | 3.8 | 849 | | 15 | 796 | 16 | 931 | 39 | 15 |
| 1.1092 | 2.9 | | 0.13080 | 1.2 | | | 0.06158 | | 2.9 | 758 | | 8 | 792 | 5 | 660 | 31 | -20 |
| 1.2819 | 6.7 | | 0.13067 | 4.7 | | | 0.07188 | | 4.7 | 838 | | 19 | 792 | 18 | 982 | 48 | 19 |
| 1.1800 | 7.4 | | 0.13011 | 4.7 | | | 0.06608 | | 7.1 | 791 | | 20 | 788 | 17 | 809 | 74 | 3 |
| 1.1541 | 7.2 | | 0.12955 | 3.0 | | | 0.06601 | | 7.1 | 779 | | 20 | 785 | 11 | 807 | 75 | 3 |
| **Ratios** | | | | | | | | | |  | **Ages** | | | | | | |
| 207Pb  235U | error (2s%) | | 206Pb  238U | error (2s%) | | | 207Pb  206U | | error  (2s%) | 207Pb  235U | | error  (1s abs) | 206Pb  238U | error  (1s abs) | 207Pb  206U | error  (1s abs) | % dis-cordance |
| 1.2002 | 19.4 | | 0.12889 | 6.4 | | | 0.06694 | | 20.8 | 801 | | 54 | 782 | 23 | 836 | 217 | 7 |
| 1.1434 | 12.2 | | 0.12770 | 4.2 | | | 0.06799 | | 10.4 | 774 | | 33 | 775 | 15 | 868 | 107 | 11 |
| 1.1521 | 12.5 | | 0.12764 | 4.8 | | | 0.06367 | | 11.4 | 778 | | 34 | 774 | 18 | 731 | 121 | -6 |
| 1.1209 | 14.4 | | 0.12741 | 7.6 | | | 0.06541 | | 7.5 | 763 | | 39 | 773 | 28 | 788 | 79 | 2 |
| 1.1332 | 6.1 | | 0.12737 | 4.8 | | | 0.06546 | | 9.6 | 769 | | 16 | 773 | 18 | 789 | 101 | 2 |
| 1.0691 | 5.2 | | 0.12704 | 2.2 | | | 0.06131 | | 5.0 | 738 | | 14 | 771 | 8 | 650 | 54 | -19 |
| 1.1457 | 7.6 | | 0.12543 | 3.3 | | | 0.06597 | | 6.0 | 775 | | 21 | 762 | 12 | 805 | 63 | 5 |
| 1.0858 | 17.0 | | 0.12496 | 6.6 | | | 0.06273 | | 15.7 | 746 | | 45 | 759 | 24 | 699 | 167 | -9 |
| 1.1711 | 6.5 | | 0.12483 | 5.8 | | | 0.06671 | | 7.0 | 787 | | 18 | 758 | 21 | 829 | 73 | 8 |
| 1.0393 | 19.1 | | 0.12108 | 7.4 | | | 0.06022 | | 17.4 | 724 | | 50 | 737 | 26 | 611 | 188 | -20 |
|  |  | |  |  | | |  | |  |  | |  |  |  |  |  |  |
| **Ghubrah Formation (Wadi Mistal, Jabal Akhdar)** | | | | | | | | | | | | | | | | | |
| 1.3792 | 15.2 | | 0.15151 | 5.6 | | | 0.06642 | | 14.6 | 880 | | 45 | 909 | 24 | 820 | 76 | -11 |
| 1.3175 | 12.8 | | 0.14760 | 6.3 | | | 0.06510 | | 15.6 | 853 | | 37 | 888 | 26 | 778 | 82 | -14 |
| 1.3241 | 11.0 | | 0.13950 | 5.2 | | | 0.06976 | | 9.4 | 856 | | 32 | 842 | 21 | 921 | 48 | 9 |
| 1.2122 | 9.1 | | 0.13364 | 4.3 | | | 0.06575 | | 9.4 | 806 | | 25 | 809 | 16 | 798 | 49 | -1 |
| 1.1649 | 12.2 | | 0.13260 | 5.2 | | | 0.06275 | | 11.8 | 784 | | 33 | 803 | 19 | 700 | 63 | -15 |
| 1.1967 | 14.8 | | 0.12599 | 6.3 | | | 0.07002 | | 14.1 | 799 | | 41 | 765 | 23 | 929 | 72 | 18 |
| 1.0488 | 12.0 | | 0.12560 | 6.9 | | | 0.06250 | | 14.2 | 728 | | 31 | 763 | 25 | 691 | 75 | -10 |
| 1.0762 | 8.8 | | 0.12480 | 6.1 | | | 0.06484 | | 8.0 | 742 | | 23 | 758 | 22 | 769 | 42 | 1 |
| 1.1497 | 12.7 | | 0.12430 | 4.6 | | | 0.06700 | | 12.9 | 777 | | 35 | 755 | 16 | 838 | 67 | 10 |
| 1.0952 | 14.1 | | 0.12245 | 4.3 | | | 0.06365 | | 15.0 | 751 | | 37 | 745 | 15 | 730 | 79 | -2 |
| 1.0942 | 19.5 | | 0.12172 | 4.6 | | | 0.06470 | | 19.4 | 751 | | 52 | 740 | 16 | 765 | 102 | 3 |
| 1.1367 | 10.0 | | 0.12127 | 4.9 | | | 0.06794 | | 10.4 | 771 | | 27 | 738 | 17 | 867 | 54 | 15 |
| 1.0364 | 6.5 | | 0.12086 | 3.9 | | | 0.06218 | | 5.4 | 722 | | 17 | 736 | 13 | 680 | 29 | -8 |
| 1.1046 | 9.2 | | 0.12086 | 4.1 | | | 0.06744 | | 8.7 | 756 | | 25 | 736 | 14 | 851 | 45 | 14 |
| 0.9964 | 8.4 | | 0.12064 | 4.6 | | | 0.06279 | | 6.8 | 702 | | 21 | 734 | 16 | 701 | 36 | -5 |
| 1.0904 | 16.5 | | 0.12049 | 4.2 | | | 0.06642 | | 17.4 | 749 | | 44 | 733 | 15 | 820 | 91 | 11 |
| 1.1841 | 10.7 | | 0.12048 | 4.5 | | | 0.07066 | | 10.1 | 793 | | 29 | 733 | 16 | 948 | 52 | 23 |
| 0.9890 | 9.0 | | 0.12035 | 4.1 | | | 0.06063 | | 7.7 | 698 | | 23 | 733 | 14 | 626 | 42 | -17 |
| 1.1385 | 10.4 | | 0.11992 | 4.6 | | | 0.06750 | | 9.5 | 772 | | 28 | 730 | 16 | 853 | 49 | 14 |
| 1.1412 | 16.3 | | 0.11959 | 5.9 | | | 0.07035 | | 16.1 | 773 | | 44 | 728 | 20 | 939 | 83 | 22 |
| 1.0253 | 9.2 | | 0.11954 | 5.0 | | | 0.06273 | | 7.4 | 717 | | 24 | 728 | 17 | 699 | 40 | -4 |
| 1.0377 | 8.9 | | 0.11934 | 4.1 | | | 0.06434 | | 8.5 | 723 | | 23 | 727 | 14 | 753 | 45 | 3 |
| 1.0255 | 12.1 | | 0.11929 | 8.6 | | | 0.06442 | | 11.7 | 717 | | 31 | 726 | 30 | 755 | 62 | 4 |
| 1.0759 | 13.9 | | 0.11894 | 6.4 | | | 0.06529 | | 12.2 | 742 | | 37 | 724 | 22 | 784 | 64 | 8 |
| 1.1610 | 15.6 | | 0.11893 | 6.7 | | | 0.07110 | | 13.5 | 782 | | 42 | 724 | 23 | 960 | 69 | 25 |
| 1.1741 | 7.0 | | 0.11874 | 3.7 | | | 0.07104 | | 6.3 | 789 | | 19 | 723 | 13 | 959 | 32 | 25 |
| 1.0173 | 15.9 | | 0.11863 | 5.5 | | | 0.06284 | | 13.8 | 713 | | 41 | 723 | 19 | 703 | 73 | -3 |
| 1.0188 | 13.7 | | 0.11821 | 4.3 | | | 0.06287 | | 13.4 | 713 | | 35 | 720 | 15 | 704 | 71 | -2 |
| 1.1271 | 14.1 | | 0.11815 | 4.1 | | | 0.06942 | | 12.1 | 766 | | 38 | 720 | 14 | 911 | 62 | 21 |
| 1.0289 | 13.6 | | 0.11801 | 6.0 | | | 0.06305 | | 13.1 | 718 | | 35 | 719 | 20 | 710 | 70 | -1 |
| 1.0415 | 7.6 | | 0.11798 | 4.0 | | | 0.06348 | | 6.5 | 725 | | 20 | 719 | 14 | 724 | 34 | 1 |
| 1.0335 | 19.7 | | 0.11795 | 6.9 | | | 0.06403 | | 21.3 | 721 | | 51 | 719 | 24 | 743 | 113 | 3 |
| 1.1300 | 16.3 | | 0.11791 | 8.1 | | | 0.06885 | | 18.8 | 768 | | 44 | 719 | 28 | 894 | 97 | 20 |
| 0.9447 | 7.5 | | 0.11779 | 3.6 | | | 0.06058 | | 6.8 | 675 | | 19 | 718 | 12 | 624 | 37 | -15 |
| 1.0630 | 10.1 | | 0.11750 | 4.6 | | | 0.06505 | | 8.9 | 735 | | 26 | 716 | 16 | 776 | 47 | 8 |
| 1.0347 | 9.5 | | 0.11715 | 4.3 | | | 0.06342 | | 9.5 | 721 | | 24 | 714 | 15 | 722 | 50 | 1 |
| 1.0414 | 6.8 | | 0.11682 | 3.9 | | | 0.06486 | | 5.9 | 725 | | 18 | 712 | 13 | 770 | 31 | 7 |
| 1.0173 | 18.0 | | 0.11645 | 6.2 | | | 0.06312 | | 16.9 | 713 | | 46 | 710 | 21 | 712 | 90 | 0 |
| 0.9664 | 10.6 | | 0.11632 | 6.3 | | | 0.06222 | | 10.0 | 687 | | 27 | 709 | 21 | 682 | 53 | -4 |
| 1.0325 | 11.9 | | 0.11630 | 4.1 | | | 0.06426 | | 11.6 | 720 | | 31 | 709 | 14 | 750 | 62 | 5 |
| 1.0791 | 12.0 | | 0.11612 | 4.3 | | | 0.06663 | | 11.6 | 743 | | 32 | 708 | 14 | 826 | 61 | 14 |
| 1.0345 | 6.9 | | 0.11597 | 4.5 | | | 0.06484 | | 6.5 | 721 | | 18 | 707 | 15 | 769 | 34 | 8 |
| 1.0193 | 7.2 | | 0.11592 | 2.9 | | | 0.06332 | | 6.5 | 714 | | 19 | 707 | 10 | 719 | 35 | 2 |
| 1.0998 | 7.1 | | 0.11564 | 4.1 | | | 0.06807 | | 6.8 | 753 | | 19 | 705 | 14 | 871 | 35 | 19 |
| **Ratios** | | | | | | | | | |  | **Ages** | | | | | | |
| 207Pb  235U | error (2s%) | | 206Pb  238U | error (2s%) | | | 207Pb  206U | | error  (2s%) | 207Pb  235U | | error  (1s abs) | 206Pb  238U | error  (1s abs) | 207Pb  206U | error  (1s abs) | % dis-cordance |
| 1.0178 | 13.4 | | 0.11560 | 7.1 | | | 0.06330 | | 14.9 | 713 | | 34 | 705 | 24 | 718 | 79 | 2 |
| 0.9951 | 10.3 | | 0.11535 | 4.0 | | | 0.06400 | | 8.2 | 701 | | 26 | 704 | 13 | 742 | 43 | 5 |
| 0.9983 | 7.9 | | 0.11524 | 5.2 | | | 0.06369 | | 7.5 | 703 | | 20 | 703 | 17 | 731 | 40 | 4 |
| 1.0932 | 8.8 | | 0.11494 | 3.1 | | | 0.06903 | | 7.6 | 750 | | 23 | 701 | 10 | 900 | 39 | 22 |
| 1.0988 | 7.1 | | 0.11443 | 4.9 | | | 0.06687 | | 7.0 | 753 | | 19 | 698 | 16 | 834 | 36 | 16 |
| 1.0153 | 7.6 | | 0.11428 | 4.1 | | | 0.06447 | | 7.2 | 712 | | 19 | 698 | 14 | 757 | 38 | 8 |
| 1.0179 | 8.6 | | 0.11410 | 4.7 | | | 0.06396 | | 7.2 | 713 | | 22 | 697 | 15 | 740 | 38 | 6 |
| 1.0922 | 8.5 | | 0.11401 | 4.3 | | | 0.06943 | | 8.3 | 750 | | 23 | 696 | 14 | 911 | 43 | 24 |
| 1.0163 | 9.7 | | 0.11398 | 4.7 | | | 0.06542 | | 8.9 | 712 | | 25 | 696 | 16 | 788 | 47 | 12 |
| 1.0521 | 18.0 | | 0.11345 | 4.6 | | | 0.06713 | | 17.1 | 730 | | 47 | 693 | 15 | 842 | 89 | 18 |
| 0.9891 | 6.3 | | 0.11341 | 3.5 | | | 0.06216 | | 5.7 | 698 | | 16 | 693 | 11 | 680 | 31 | -2 |
| 1.0485 | 16.9 | | 0.11341 | 8.4 | | | 0.06967 | | 14.7 | 728 | | 44 | 692 | 28 | 919 | 75 | 25 |
| 0.9250 | 8.0 | | 0.11250 | 4.3 | | | 0.06076 | | 6.9 | 665 | | 19 | 687 | 14 | 631 | 37 | -9 |
| 0.9926 | 13.9 | | 0.11229 | 8.5 | | | 0.06361 | | 10.3 | 700 | | 35 | 686 | 28 | 729 | 54 | 6 |
| 0.9903 | 17.4 | | 0.11215 | 6.9 | | | 0.06678 | | 18.0 | 699 | | 44 | 685 | 22 | 831 | 94 | 18 |
| 0.9498 | 13.1 | | 0.11214 | 4.3 | | | 0.06106 | | 12.4 | 678 | | 32 | 685 | 14 | 641 | 67 | -7 |
| 0.9726 | 9.8 | | 0.11172 | 4.8 | | | 0.06364 | | 8.8 | 690 | | 24 | 683 | 16 | 730 | 47 | 6 |
| 0.9687 | 17.4 | | 0.11165 | 6.0 | | | 0.06198 | | 17.4 | 688 | | 43 | 682 | 20 | 673 | 93 | -1 |
| 1.0099 | 17.8 | | 0.11110 | 9.2 | | | 0.06487 | | 16.5 | 709 | | 45 | 679 | 30 | 770 | 87 | 12 |
| 0.9524 | 18.1 | | 0.11071 | 5.3 | | | 0.06335 | | 16.1 | 679 | | 45 | 677 | 17 | 720 | 86 | 6 |
| 0.9214 | 11.6 | | 0.10890 | 5.4 | | | 0.06205 | | 9.1 | 663 | | 28 | 666 | 17 | 676 | 49 | 1 |
| 0.9096 | 9.8 | | 0.10738 | 9.3 | | | 0.06352 | | 8.4 | 657 | | 24 | 657 | 29 | 726 | 45 | 9 |
| 1.0174 | 16.2 | | 0.10706 | 9.7 | | | 0.06787 | | 12.9 | 713 | | 41 | 656 | 30 | 865 | 67 | 24 |
| 0.9714 | 8.2 | | 0.10691 | 4.4 | | | 0.06399 | | 6.0 | 689 | | 20 | 655 | 14 | 741 | 32 | 12 |
| 0.9713 | 17.4 | | 0.10637 | 5.7 | | | 0.06716 | | 13.6 | 689 | | 44 | 652 | 18 | 843 | 71 | 23 |
| 0.9532 | 15.6 | | 0.10601 | 6.7 | | | 0.06471 | | 15.6 | 680 | | 39 | 650 | 21 | 765 | 82 | 15 |
| 0.8660 | 13.4 | | 0.10569 | 5.6 | | | 0.05799 | | 13.1 | 633 | | 32 | 648 | 17 | 529 | 72 | -22 |
| 0.8869 | 12.3 | | 0.10201 | 7.5 | | | 0.06521 | | 9.1 | 645 | | 29 | 626 | 22 | 781 | 48 | 20 |
| 0.8568 | 10.0 | | 0.09993 | 5.0 | | | 0.06227 | | 9.1 | 628 | | 23 | 614 | 15 | 683 | 48 | 10 |
| 0.8318 | 11.6 | | 0.09988 | 7.6 | | | 0.06127 | | 9.5 | 615 | | 27 | 614 | 22 | 649 | 51 | 5 |
| 0.8965 | 11.0 | | 0.09816 | 6.5 | | | 0.06580 | | 9.1 | 650 | | 26 | 604 | 19 | 800 | 48 | 25 |
| 0.8022 | 14.8 | | 0.09688 | 6.7 | | | 0.06141 | | 11.9 | 598 | | 33 | 596 | 19 | 654 | 64 | 9 |
| 0.7364 | 15.5 | | 0.09229 | 8.9 | | | 0.06010 | | 10.2 | 560 | | 33 | 569 | 24 | 607 | 55 | 6 |
| 0.7507 | 10.9 | | 0.09010 | 8.8 | | | 0.06069 | | 6.3 | 569 | | 24 | 556 | 23 | 628 | 34 | 11 |
| 0.5482 | 16.8 | | 0.06732 | 7.4 | | | 0.05800 | | 15.5 | 444 | | 30 | 420 | 15 | 530 | 85 | 21 |
|  |  | |  |  | | |  | |  |  | |  |  |  |  |  |  |
| **Saqlah Formation (Wadi Mistal, Jabal Akhdar)** | | | | | | | | | | | | | | | | | |
| 1.4868 | 11.5 | | 0.15951 | 5.3 | | | 0.06715 | | 13.3 | 925 | | 35 | 954 | 23 | 842 | 69 | -13 |
| 1.5416 | 9.5 | | 0.15951 | 5.6 | | | 0.06922 | | 8.4 | 947 | | 29 | 954 | 25 | 905 | 43 | -5 |
| 1.6514 | 11.9 | | 0.15748 | 7.1 | | | 0.07277 | | 13.2 | 990 | | 38 | 943 | 31 | 1007 | 67 | 6 |
| 1.5046 | 8.8 | | 0.15711 | 5.0 | | | 0.07167 | | 8.8 | 932 | | 27 | 941 | 22 | 977 | 45 | 4 |
| 1.4455 | 10.3 | | 0.15676 | 7.3 | | | 0.06667 | | 12.9 | 908 | | 31 | 939 | 32 | 828 | 67 | -13 |
| 1.5652 | 15.7 | | 0.15649 | 5.1 | | | 0.07552 | | 16.4 | 957 | | 49 | 937 | 22 | 1082 | 82 | 13 |
| 1.4003 | 11.4 | | 0.15552 | 6.8 | | | 0.06774 | | 14.2 | 889 | | 34 | 932 | 29 | 861 | 74 | -8 |
| 1.3844 | 9.1 | | 0.15280 | 4.7 | | | 0.06456 | | 7.9 | 882 | | 27 | 917 | 20 | 760 | 42 | -21 |
| 1.3889 | 4.5 | | 0.15229 | 2.4 | | | 0.06692 | | 4.2 | 884 | | 13 | 914 | 10 | 835 | 22 | -9 |
| 1.4393 | 7.1 | | 0.15207 | 4.2 | | | 0.06728 | | 8.4 | 905 | | 21 | 913 | 18 | 846 | 44 | -8 |
| 1.4767 | 10.0 | | 0.15122 | 6.1 | | | 0.07204 | | 7.2 | 921 | | 30 | 908 | 26 | 987 | 37 | 8 |
| 1.5618 | 5.5 | | 0.15083 | 1.8 | | | 0.07582 | | 5.0 | 955 | | 17 | 906 | 8 | 1090 | 25 | 17 |
| 1.4498 | 6.0 | | 0.15033 | 3.5 | | | 0.06909 | | 5.0 | 910 | | 18 | 903 | 15 | 902 | 26 | 0 |
| 1.3861 | 17.9 | | 0.14907 | 9.0 | | | 0.06640 | | 16.7 | 883 | | 53 | 896 | 37 | 819 | 87 | -9 |
| 1.3020 | 12.2 | | 0.14876 | 5.8 | | | 0.06475 | | 9.0 | 847 | | 35 | 894 | 24 | 766 | 48 | -17 |
| 1.3999 | 17.2 | | 0.14839 | 9.2 | | | 0.06845 | | 11.4 | 889 | | 51 | 892 | 38 | 882 | 59 | -1 |
| 1.5488 | 5.2 | | 0.14812 | 1.3 | | | 0.07620 | | 4.4 | 950 | | 16 | 890 | 5 | 1100 | 22 | 19 |
| 1.3693 | 9.4 | | 0.14794 | 4.3 | | | 0.06755 | | 9.2 | 876 | | 27 | 889 | 18 | 855 | 48 | -4 |
| 1.5360 | 5.5 | | 0.14782 | 2.0 | | | 0.07644 | | 5.5 | 945 | | 17 | 889 | 8 | 1107 | 27 | 20 |
| **Ratios** | | | | | | | | | |  | **Ages** | | | | | | |
| 207Pb  235U | error (2s%) | | 206Pb  238U | error (2s%) | | | 207Pb  206U | | error  (2s%) | 207Pb  235U | | error  (1s abs) | 206Pb  238U | error  (1s abs) | 207Pb  206U | error  (1s abs) | % dis-cordance |
| 1.3212 | 9.7 | | 0.14653 | 4.7 | | | 0.06585 | | 9.4 | 855 | | 28 | 882 | 19 | 801 | 49 | -10 |
| 1.3017 | 6.7 | | 0.14607 | 3.6 | | | 0.06462 | | 6.8 | 846 | | 19 | 879 | 15 | 762 | 36 | -15 |
| 1.3668 | 19.3 | | 0.14599 | 8.1 | | | 0.06857 | | 16.3 | 875 | | 57 | 878 | 33 | 886 | 84 | 1 |
| 1.4135 | 9.6 | | 0.14550 | 4.5 | | | 0.06965 | | 9.6 | 895 | | 29 | 876 | 18 | 918 | 49 | 5 |
| 1.3059 | 10.5 | | 0.14549 | 5.0 | | | 0.06539 | | 9.9 | 848 | | 30 | 876 | 21 | 787 | 52 | -11 |
| 1.4747 | 5.2 | | 0.14421 | 2.0 | | | 0.07541 | | 5.3 | 920 | | 16 | 868 | 8 | 1080 | 27 | 20 |
| 1.3632 | 10.0 | | 0.14412 | 5.1 | | | 0.06704 | | 8.6 | 873 | | 29 | 868 | 21 | 839 | 45 | -3 |
| 1.3777 | 15.4 | | 0.14376 | 5.5 | | | 0.07073 | | 15.6 | 879 | | 45 | 866 | 22 | 950 | 80 | 9 |
| 1.3004 | 9.4 | | 0.14362 | 5.6 | | | 0.06694 | | 7.8 | 846 | | 27 | 865 | 23 | 836 | 41 | -3 |
| 1.3122 | 9.8 | | 0.14345 | 4.0 | | | 0.06679 | | 9.5 | 851 | | 28 | 864 | 16 | 831 | 50 | -4 |
| 1.2501 | 6.7 | | 0.14342 | 4.2 | | | 0.06330 | | 5.3 | 823 | | 19 | 864 | 17 | 718 | 28 | -20 |
| 1.3932 | 8.1 | | 0.14337 | 3.3 | | | 0.06910 | | 7.1 | 886 | | 24 | 864 | 13 | 902 | 37 | 4 |
| 1.2632 | 6.7 | | 0.14335 | 2.4 | | | 0.06604 | | 5.8 | 829 | | 19 | 864 | 10 | 808 | 30 | -7 |
| 1.2805 | 10.9 | | 0.14325 | 6.2 | | | 0.06684 | | 9.9 | 837 | | 31 | 863 | 25 | 833 | 51 | -4 |
| 1.2621 | 11.0 | | 0.14320 | 4.6 | | | 0.06374 | | 11.5 | 829 | | 31 | 863 | 19 | 733 | 61 | -18 |
| 1.3220 | 9.4 | | 0.14320 | 4.0 | | | 0.06766 | | 8.6 | 855 | | 27 | 863 | 16 | 858 | 45 | -1 |
| 1.4750 | 15.5 | | 0.14306 | 9.2 | | | 0.07465 | | 14.4 | 920 | | 47 | 862 | 37 | 1059 | 72 | 19 |
| 1.2825 | 8.1 | | 0.14281 | 4.5 | | | 0.06546 | | 6.2 | 838 | | 23 | 861 | 18 | 789 | 33 | -9 |
| 1.2895 | 6.4 | | 0.14218 | 3.9 | | | 0.06765 | | 6.7 | 841 | | 18 | 857 | 16 | 858 | 35 | 0 |
| 1.2988 | 13.7 | | 0.14201 | 6.8 | | | 0.06682 | | 9.0 | 845 | | 39 | 856 | 27 | 832 | 47 | -3 |
| 1.3146 | 10.3 | | 0.14171 | 6.0 | | | 0.06863 | | 7.7 | 852 | | 30 | 854 | 24 | 888 | 40 | 4 |
| 1.2351 | 6.8 | | 0.14170 | 2.4 | | | 0.06492 | | 7.2 | 817 | | 19 | 854 | 9 | 772 | 38 | -11 |
| 1.2395 | 10.9 | | 0.14169 | 5.4 | | | 0.06378 | | 10.5 | 819 | | 31 | 854 | 22 | 734 | 55 | -16 |
| 1.3640 | 6.0 | | 0.14152 | 4.7 | | | 0.06784 | | 3.8 | 874 | | 18 | 853 | 19 | 864 | 20 | 1 |
| 1.3184 | 12.4 | | 0.14100 | 7.6 | | | 0.06776 | | 12.9 | 854 | | 36 | 850 | 30 | 861 | 67 | 1 |
| 1.4341 | 11.5 | | 0.14084 | 4.5 | | | 0.07063 | | 11.0 | 903 | | 34 | 849 | 18 | 947 | 56 | 10 |
| 1.2584 | 11.0 | | 0.14058 | 5.4 | | | 0.06371 | | 9.1 | 827 | | 31 | 848 | 21 | 732 | 48 | -16 |
| 1.2868 | 9.5 | | 0.14014 | 4.2 | | | 0.06555 | | 9.3 | 840 | | 27 | 845 | 16 | 792 | 49 | -7 |
| 1.4898 | 9.1 | | 0.13940 | 3.3 | | | 0.07533 | | 9.0 | 926 | | 28 | 841 | 13 | 1077 | 45 | 22 |
| 1.2075 | 12.3 | | 0.13903 | 4.7 | | | 0.06200 | | 10.2 | 804 | | 34 | 839 | 18 | 674 | 55 | -24 |
| 1.3284 | 9.1 | | 0.13812 | 4.3 | | | 0.06991 | | 9.7 | 858 | | 26 | 834 | 17 | 926 | 50 | 10 |
| 1.1821 | 11.3 | | 0.13804 | 4.6 | | | 0.06176 | | 11.0 | 792 | | 31 | 834 | 18 | 666 | 59 | -25 |
| 1.3265 | 9.7 | | 0.13786 | 6.2 | | | 0.06840 | | 8.4 | 857 | | 28 | 833 | 24 | 881 | 43 | 5 |
| 1.3769 | 9.8 | | 0.13766 | 4.1 | | | 0.07276 | | 9.1 | 879 | | 29 | 831 | 16 | 1007 | 46 | 17 |
| 1.2017 | 15.1 | | 0.13741 | 6.5 | | | 0.06558 | | 10.8 | 801 | | 42 | 830 | 25 | 793 | 57 | -5 |
| 1.1959 | 17.1 | | 0.13698 | 6.6 | | | 0.06465 | | 13.8 | 799 | | 47 | 828 | 26 | 763 | 73 | -8 |
| 1.2138 | 8.0 | | 0.13657 | 3.7 | | | 0.06334 | | 6.8 | 807 | | 22 | 825 | 14 | 720 | 36 | -15 |
| 1.1940 | 16.3 | | 0.13635 | 8.9 | | | 0.06455 | | 11.1 | 798 | | 45 | 824 | 34 | 760 | 58 | -8 |
| 1.3779 | 14.8 | | 0.13600 | 5.8 | | | 0.07477 | | 16.3 | 880 | | 44 | 822 | 22 | 1062 | 82 | 23 |
| 1.1724 | 9.6 | | 0.13597 | 6.8 | | | 0.06345 | | 7.9 | 788 | | 26 | 822 | 26 | 723 | 42 | -14 |
| 1.2563 | 9.8 | | 0.13576 | 5.9 | | | 0.06680 | | 9.3 | 826 | | 28 | 821 | 23 | 832 | 48 | 1 |
| 1.2920 | 10.6 | | 0.13524 | 7.4 | | | 0.06947 | | 9.2 | 842 | | 30 | 818 | 28 | 913 | 47 | 10 |
| 1.1062 | 19.1 | | 0.13427 | 8.6 | | | 0.06228 | | 13.6 | 756 | | 51 | 812 | 33 | 684 | 72 | -19 |
| 1.1607 | 6.9 | | 0.13421 | 4.4 | | | 0.06272 | | 6.1 | 782 | | 19 | 812 | 17 | 699 | 32 | -16 |
| 1.2855 | 11.9 | | 0.13420 | 7.9 | | | 0.06929 | | 9.9 | 839 | | 34 | 812 | 30 | 907 | 51 | 11 |
| 1.3228 | 9.6 | | 0.13394 | 7.6 | | | 0.07111 | | 9.1 | 856 | | 28 | 810 | 29 | 960 | 46 | 16 |
| 1.2074 | 8.4 | | 0.13330 | 4.2 | | | 0.06522 | | 7.0 | 804 | | 23 | 807 | 16 | 781 | 37 | -3 |
| 1.1484 | 15.7 | | 0.13316 | 5.8 | | | 0.06223 | | 10.2 | 776 | | 43 | 806 | 22 | 682 | 55 | -18 |
| 1.2496 | 7.0 | | 0.13291 | 4.5 | | | 0.06592 | | 5.3 | 823 | | 20 | 804 | 17 | 804 | 28 | 0 |
| 1.2183 | 9.8 | | 0.13278 | 4.2 | | | 0.06361 | | 7.3 | 809 | | 27 | 804 | 16 | 729 | 38 | -10 |
| 1.4389 | 18.7 | | 0.13191 | 6.1 | | | 0.07480 | | 17.1 | 905 | | 56 | 799 | 23 | 1063 | 86 | 25 |
| 1.1383 | 12.4 | | 0.13185 | 4.6 | | | 0.06278 | | 11.0 | 772 | | 34 | 798 | 17 | 701 | 58 | -14 |
| 1.2440 | 14.6 | | 0.13029 | 5.9 | | | 0.07099 | | 13.6 | 821 | | 41 | 790 | 22 | 957 | 70 | 18 |
| 1.1854 | 6.7 | | 0.12939 | 4.4 | | | 0.06807 | | 4.9 | 794 | | 19 | 784 | 16 | 871 | 25 | 10 |
| 1.2003 | 12.0 | | 0.12848 | 9.0 | | | 0.06584 | | 9.5 | 801 | | 33 | 779 | 33 | 801 | 50 | 3 |
| 1.1641 | 9.1 | | 0.12709 | 5.5 | | | 0.06540 | | 7.6 | 784 | | 25 | 771 | 20 | 787 | 40 | 2 |
| **Ratios** | | | | | | | | | |  | **Ages** | | | | | | |
| 207Pb  235U | error (2s%) | | 206Pb  238U | error (2s%) | | | 207Pb  206U | | error  (2s%) | 207Pb  235U | | error  (1s abs) | 206Pb  238U | error  (1s abs) | 207Pb  206U | error  (1s abs) | % dis-cordance |
| 1.2153 | 9.7 | | 0.12578 | 6.2 | | | 0.07116 | | 7.7 | 808 | | 27 | 764 | 22 | 962 | 40 | 21 |
| 1.0886 | 12.3 | | 0.12544 | 6.6 | | | 0.06332 | | 8.9 | 748 | | 32 | 762 | 24 | 719 | 47 | -6 |
| 1.1015 | 11.4 | | 0.12538 | 5.8 | | | 0.06347 | | 9.8 | 754 | | 30 | 761 | 21 | 724 | 52 | -5 |
| 1.2215 | 15.0 | | 0.12460 | 8.8 | | | 0.07117 | | 9.6 | 810 | | 42 | 757 | 31 | 962 | 49 | 21 |
| 1.1446 | 9.3 | | 0.12176 | 5.8 | | | 0.06747 | | 7.1 | 775 | | 25 | 741 | 20 | 852 | 37 | 13 |
| 1.0745 | 8.5 | | 0.12174 | 6.0 | | | 0.06520 | | 4.3 | 741 | | 22 | 741 | 21 | 781 | 23 | 5 |
| 0.9668 | 8.8 | | 0.11895 | 5.7 | | | 0.06156 | | 7.0 | 687 | | 22 | 725 | 19 | 659 | 37 | -10 |
| 1.0672 | 10.5 | | 0.11879 | 5.8 | | | 0.06732 | | 7.0 | 737 | | 28 | 724 | 20 | 848 | 36 | 15 |
| 1.0588 | 11.4 | | 0.11844 | 8.9 | | | 0.06550 | | 4.9 | 733 | | 30 | 722 | 30 | 791 | 26 | 9 |
| 1.0939 | 6.9 | | 0.11837 | 7.4 | | | 0.06532 | | 5.5 | 750 | | 18 | 721 | 25 | 785 | 29 | 8 |
| 0.9527 | 15.3 | | 0.11718 | 8.6 | | | 0.06257 | | 7.2 | 680 | | 38 | 714 | 29 | 694 | 38 | -3 |
| 1.0141 | 11.6 | | 0.11595 | 7.0 | | | 0.06494 | | 5.1 | 711 | | 30 | 707 | 24 | 772 | 27 | 8 |
| 1.0072 | 10.5 | | 0.11593 | 5.9 | | | 0.06354 | | 7.1 | 707 | | 27 | 707 | 20 | 726 | 38 | 3 |
| 1.0840 | 7.7 | | 0.11530 | 5.3 | | | 0.06846 | | 6.3 | 746 | | 20 | 703 | 18 | 883 | 33 | 20 |
| 0.9849 | 14.4 | | 0.11440 | 9.7 | | | 0.06620 | | 4.4 | 696 | | 36 | 698 | 32 | 813 | 23 | 14 |
| 1.0211 | 9.6 | | 0.11273 | 7.4 | | | 0.06601 | | 5.8 | 714 | | 25 | 689 | 24 | 807 | 30 | 15 |
| 1.0056 | 7.5 | | 0.11072 | 7.2 | | | 0.06557 | | 3.8 | 707 | | 19 | 677 | 23 | 793 | 20 | 15 |
| 0.8920 | 16.9 | | 0.10363 | 5.8 | | | 0.06209 | | 16.7 | 647 | | 40 | 636 | 18 | 677 | 89 | 6 |
| 0.8001 | 19.3 | | 0.10025 | 8.4 | | | 0.06011 | | 9.2 | 597 | | 43 | 616 | 25 | 608 | 50 | -1 |
| 0.8458 | 14.5 | | 0.09569 | 9.3 | | | 0.06506 | | 5.3 | 622 | | 34 | 589 | 26 | 776 | 28 | 24 |
|  |  | |  |  | | |  | |  |  | |  |  |  |  |  |  |
| **Fiq Formation (Wadi Mistal and Wadi Sahtan, Jabal Akhdar)** | | | | | | | | | | | | | | | | | |
| 11.1974 | 5.1 | | 0.48521 | 5.4 | | | 0.16764 | 2.5 | | 2540 | | 24 | 2550 | 57 | 2534 | 21 | -1 |
| 9.0944 | 3.5 | | 0.43596 | 3.1 | | | 0.15082 | 1.5 | | 2348 | | 16 | 2333 | 30 | 2355 | 13 | 1 |
| 5.5743 | 8.3 | | 0.35658 | 5.2 | | | 0.11200 | 7.7 | | 1912 | | 36 | 1966 | 44 | 1832 | 70 | -7 |
| 5.1535 | 8.4 | | 0.34822 | 5.0 | | | 0.10823 | 6.1 | | 1845 | | 36 | 1926 | 42 | 1770 | 56 | -9 |
| 5.3459 | 2.4 | | 0.34613 | 3.9 | | | 0.11104 | 1.7 | | 1876 | | 10 | 1916 | 32 | 1816 | 16 | -5 |
| 5.4731 | 10.9 | | 0.34325 | 4.0 | | | 0.11476 | 10.3 | | 1896 | | 47 | 1902 | 33 | 1876 | 47 | -1 |
| 5.3328 | 4.0 | | 0.33931 | 2.8 | | | 0.11419 | 3.2 | | 1874 | | 17 | 1883 | 23 | 1867 | 29 | -1 |
| 5.4496 | 5.6 | | 0.33918 | 3.6 | | | 0.11566 | 4.7 | | 1893 | | 24 | 1883 | 29 | 1890 | 21 | 0 |
| 5.2856 | 2.4 | | 0.33646 | 4.6 | | | 0.11228 | 1.6 | | 1867 | | 10 | 1870 | 37 | 1837 | 14 | -2 |
| 5.3078 | 3.7 | | 0.33560 | 2.8 | | | 0.11383 | 2.9 | | 1870 | | 16 | 1865 | 23 | 1861 | 26 | 0 |
| 5.3979 | 6.4 | | 0.33418 | 3.8 | | | 0.11912 | 5.8 | | 1885 | | 27 | 1859 | 30 | 1943 | 52 | 4 |
| 5.1509 | 3.7 | | 0.33258 | 3.2 | | | 0.11114 | 3.0 | | 1845 | | 16 | 1851 | 26 | 1818 | 28 | -2 |
| 5.0167 | 4.7 | | 0.32188 | 3.2 | | | 0.11183 | 3.5 | | 1822 | | 20 | 1799 | 25 | 1829 | 16 | 2 |
| 4.1003 | 3.1 | | 0.31040 | 1.8 | | | 0.09817 | 1.8 | | 1654 | | 13 | 1743 | 13 | 1590 | 17 | -10 |
| 4.4392 | 6.6 | | 0.30783 | 4.0 | | | 0.10601 | 4.7 | | 1720 | | 27 | 1730 | 31 | 1732 | 43 | 0 |
| 1.7554 | 2.8 | | 0.17663 | 2.4 | | | 0.07229 | 1.9 | | 1029 | | 9 | 1049 | 11 | 994 | 20 | -5 |
| 1.7429 | 9.7 | | 0.17557 | 6.1 | | | 0.07286 | 7.8 | | 1025 | | 31 | 1043 | 29 | 1010 | 79 | -3 |
| 1.7212 | 7.4 | | 0.16525 | 2.8 | | | 0.07752 | 8.0 | | 1016 | | 24 | 986 | 13 | 1135 | 80 | 13 |
| 1.5577 | 6.3 | | 0.16269 | 7.0 | | | 0.07020 | 4.2 | | 954 | | 19 | 972 | 31 | 934 | 43 | -4 |
| 1.4180 | 6.7 | | 0.15742 | 6.0 | | | 0.06522 | 4.6 | | 897 | | 20 | 942 | 26 | 781 | 48 | -21 |
| 1.4651 | 9.9 | | 0.15565 | 9.5 | | | 0.06799 | 4.7 | | 916 | | 30 | 933 | 41 | 868 | 48 | -7 |
| 1.4171 | 7.3 | | 0.15545 | 2.9 | | | 0.06588 | 7.2 | | 896 | | 22 | 931 | 13 | 803 | 76 | -16 |
| 1.4708 | 7.8 | | 0.15513 | 3.8 | | | 0.07073 | 6.1 | | 918 | | 24 | 930 | 17 | 950 | 63 | 2 |
| 1.4618 | 6.4 | | 0.15497 | 4.2 | | | 0.06823 | 5.3 | | 915 | | 19 | 929 | 18 | 876 | 55 | -6 |
| 1.3715 | 3.3 | | 0.15446 | 1.5 | | | 0.06560 | 3.2 | | 877 | | 10 | 926 | 6 | 794 | 34 | -17 |
| 1.4991 | 3.5 | | 0.15400 | 1.9 | | | 0.07027 | 2.7 | | 930 | | 11 | 923 | 8 | 936 | 28 | 1 |
| 1.4983 | 4.3 | | 0.15395 | 3.5 | | | 0.06990 | 3.4 | | 930 | | 13 | 923 | 15 | 926 | 35 | 0 |
| 1.3956 | 3.3 | | 0.15330 | 2.5 | | | 0.06600 | 3.2 | | 887 | | 10 | 919 | 11 | 806 | 33 | -14 |
| 1.3881 | 8.3 | | 0.15226 | 4.5 | | | 0.06701 | 7.9 | | 884 | | 25 | 914 | 19 | 838 | 82 | -9 |
| 1.3797 | 2.9 | | 0.15188 | 1.4 | | | 0.06671 | 2.7 | | 880 | | 9 | 912 | 6 | 829 | 29 | -10 |
| 1.3149 | 5.7 | | 0.15187 | 2.4 | | | 0.06450 | 5.7 | | 852 | | 17 | 911 | 10 | 758 | 60 | -20 |
| 1.4400 | 10.3 | | 0.15182 | 5.0 | | | 0.06731 | 9.7 | | 906 | | 31 | 911 | 21 | 848 | 101 | -8 |
| 1.5210 | 8.0 | | 0.15155 | 3.7 | | | 0.07238 | 8.0 | | 939 | | 24 | 910 | 16 | 997 | 82 | 9 |
| 1.3756 | 6.0 | | 0.15126 | 3.0 | | | 0.06708 | 5.5 | | 879 | | 18 | 908 | 13 | 840 | 57 | -8 |
| **Ratios** | | | | | | | | | |  | **Ages** | | | | | | |
| 207Pb  235U | error (2s%) | | 206Pb  238U | error (2s%) | | | 207Pb  206U | error  (2s%) | | 207Pb  235U | | error  (1s abs) | 206Pb  238U | error  (1s abs) | 207Pb  206U | error  (1s abs) | % dis-cordance |
| 1.4238 | 6.7 | | 0.15037 | 2.7 | | | 0.07028 | 5.8 | | 899 | | 20 | 903 | 11 | 937 | 59 | 4 |
| 1.3964 | 4.1 | | 0.15006 | 2.1 | | | 0.06733 | 4.0 | | 887 | | 12 | 901 | 9 | 848 | 42 | -6 |
| 1.4130 | 5.8 | | 0.14981 | 3.4 | | | 0.06949 | 5.1 | | 894 | | 17 | 900 | 14 | 913 | 52 | 1 |
| 1.3885 | 3.3 | | 0.14948 | 2.2 | | | 0.06742 | 3.5 | | 884 | | 10 | 898 | 9 | 851 | 36 | -6 |
| 1.5656 | 16.2 | | 0.14940 | 3.6 | | | 0.07730 | 16.6 | | 957 | | 50 | 898 | 15 | 1129 | 165 | 20 |
| 1.3893 | 11.2 | | 0.14939 | 3.4 | | | 0.06807 | 10.8 | | 884 | | 33 | 898 | 14 | 871 | 112 | -3 |
| 1.3033 | 8.2 | | 0.14927 | 2.8 | | | 0.06437 | 7.3 | | 847 | | 23 | 897 | 12 | 754 | 77 | -19 |
| 1.3229 | 7.3 | | 0.14916 | 3.8 | | | 0.06502 | 6.0 | | 856 | | 21 | 896 | 16 | 775 | 32 | -16 |
| 1.3575 | 6.8 | | 0.14892 | 3.2 | | | 0.06625 | 6.2 | | 871 | | 20 | 895 | 14 | 814 | 65 | -10 |
| 1.3463 | 2.7 | | 0.14880 | 1.8 | | | 0.06534 | 2.7 | | 866 | | 8 | 894 | 8 | 785 | 29 | -14 |
| 1.3635 | 6.5 | | 0.14880 | 3.3 | | | 0.06671 | 6.4 | | 873 | | 19 | 894 | 14 | 829 | 66 | -8 |
| 1.3780 | 5.5 | | 0.14865 | 3.6 | | | 0.06774 | 4.2 | | 880 | | 16 | 893 | 15 | 861 | 44 | -4 |
| 1.2871 | 6.3 | | 0.14864 | 3.1 | | | 0.06383 | 5.3 | | 840 | | 18 | 893 | 13 | 736 | 57 | -21 |
| 1.4788 | 13.1 | | 0.14846 | 3.8 | | | 0.07479 | 13.4 | | 922 | | 40 | 892 | 16 | 1063 | 135 | 16 |
| 1.3901 | 6.5 | | 0.14836 | 4.5 | | | 0.06899 | 5.1 | | 885 | | 19 | 892 | 19 | 899 | 52 | 1 |
| 1.3226 | 4.5 | | 0.14834 | 2.5 | | | 0.06477 | 3.0 | | 856 | | 13 | 892 | 10 | 767 | 32 | -16 |
| 1.3299 | 2.4 | | 0.14833 | 1.7 | | | 0.06550 | 2.2 | | 859 | | 7 | 892 | 7 | 791 | 23 | -13 |
| 1.4196 | 4.0 | | 0.14820 | 2.4 | | | 0.06878 | 3.8 | | 897 | | 12 | 891 | 10 | 892 | 39 | 0 |
| 1.4492 | 3.8 | | 0.14808 | 2.4 | | | 0.07159 | 3.8 | | 910 | | 11 | 890 | 10 | 974 | 39 | 9 |
| 1.3331 | 3.9 | | 0.14789 | 2.1 | | | 0.06687 | 2.9 | | 860 | | 11 | 889 | 9 | 834 | 31 | -7 |
| 1.3653 | 4.0 | | 0.14784 | 1.6 | | | 0.06789 | 3.9 | | 874 | | 12 | 889 | 7 | 865 | 40 | -3 |
| 1.2676 | 19.5 | | 0.14772 | 5.5 | | | 0.06336 | 16.5 | | 831 | | 55 | 888 | 23 | 720 | 175 | -23 |
| 1.3683 | 8.0 | | 0.14771 | 6.8 | | | 0.06772 | 5.2 | | 875 | | 24 | 888 | 28 | 860 | 54 | -3 |
| 1.3306 | 12.4 | | 0.14770 | 4.4 | | | 0.06601 | 10.9 | | 859 | | 36 | 888 | 18 | 807 | 57 | -10 |
| 1.3583 | 4.1 | | 0.14765 | 5.0 | | | 0.06726 | 2.7 | | 871 | | 12 | 888 | 21 | 846 | 28 | -5 |
| 1.3033 | 13.7 | | 0.14758 | 6.0 | | | 0.06539 | 14.9 | | 847 | | 39 | 887 | 25 | 787 | 156 | -13 |
| 1.3701 | 2.3 | | 0.14754 | 1.2 | | | 0.06777 | 2.3 | | 876 | | 7 | 887 | 5 | 861 | 23 | -3 |
| 1.3048 | 3.8 | | 0.14726 | 1.8 | | | 0.06538 | 3.4 | | 848 | | 11 | 886 | 7 | 787 | 35 | -13 |
| 1.3039 | 3.9 | | 0.14723 | 1.5 | | | 0.06497 | 3.8 | | 847 | | 11 | 885 | 6 | 773 | 40 | -14 |
| 1.2454 | 13.7 | | 0.14721 | 3.9 | | | 0.06459 | 13.6 | | 821 | | 38 | 885 | 16 | 761 | 72 | -16 |
| 1.3413 | 4.0 | | 0.14712 | 2.8 | | | 0.06672 | 3.3 | | 864 | | 12 | 885 | 12 | 829 | 34 | -7 |
| 1.3386 | 3.5 | | 0.14699 | 3.7 | | | 0.06559 | 2.9 | | 863 | | 10 | 884 | 15 | 793 | 30 | -11 |
| 1.3951 | 4.4 | | 0.14675 | 3.6 | | | 0.06825 | 3.0 | | 887 | | 13 | 883 | 15 | 876 | 31 | -1 |
| 1.3633 | 4.3 | | 0.14671 | 4.0 | | | 0.06645 | 2.5 | | 873 | | 13 | 882 | 16 | 821 | 27 | -8 |
| 1.3304 | 3.4 | | 0.14664 | 2.2 | | | 0.06565 | 3.1 | | 859 | | 10 | 882 | 9 | 795 | 32 | -11 |
| 1.4707 | 8.3 | | 0.14657 | 3.3 | | | 0.07300 | 8.2 | | 918 | | 25 | 882 | 14 | 1014 | 84 | 13 |
| 1.3729 | 5.0 | | 0.14640 | 3.4 | | | 0.06877 | 4.6 | | 877 | | 15 | 881 | 14 | 892 | 47 | 1 |
| 1.4493 | 4.5 | | 0.14637 | 1.7 | | | 0.07205 | 4.5 | | 910 | | 14 | 881 | 7 | 987 | 45 | 11 |
| 1.3405 | 9.1 | | 0.14635 | 3.8 | | | 0.06596 | 8.3 | | 863 | | 26 | 880 | 15 | 805 | 87 | -9 |
| 1.4024 | 3.4 | | 0.14617 | 1.6 | | | 0.07040 | 3.3 | | 890 | | 10 | 879 | 6 | 940 | 34 | 6 |
| 1.2818 | 10.6 | | 0.14604 | 3.2 | | | 0.06375 | 9.5 | | 838 | | 30 | 879 | 13 | 733 | 101 | -20 |
| 1.2575 | 5.7 | | 0.14604 | 3.0 | | | 0.06360 | 3.5 | | 827 | | 16 | 879 | 12 | 728 | 38 | -21 |
| 1.2772 | 9.8 | | 0.14600 | 3.9 | | | 0.06393 | 8.6 | | 836 | | 28 | 879 | 16 | 739 | 91 | -19 |
| 1.3529 | 13.2 | | 0.14596 | 4.7 | | | 0.06739 | 12.9 | | 869 | | 38 | 878 | 19 | 850 | 134 | -3 |
| 1.2537 | 10.5 | | 0.14588 | 4.2 | | | 0.06284 | 11.4 | | 825 | | 30 | 878 | 17 | 703 | 121 | -25 |
| 1.3767 | 9.0 | | 0.14586 | 3.9 | | | 0.06838 | 6.9 | | 879 | | 26 | 878 | 16 | 880 | 71 | 0 |
| 1.2876 | 5.5 | | 0.14582 | 3.3 | | | 0.06286 | 5.0 | | 840 | | 16 | 877 | 14 | 703 | 53 | -25 |
| 1.3584 | 3.8 | | 0.14564 | 3.3 | | | 0.06713 | 3.7 | | 871 | | 11 | 877 | 13 | 842 | 38 | -4 |
| 1.3019 | 4.8 | | 0.14563 | 2.6 | | | 0.06538 | 3.9 | | 847 | | 14 | 876 | 11 | 787 | 41 | -11 |
| 1.2737 | 5.5 | | 0.14539 | 2.9 | | | 0.06512 | 4.2 | | 834 | | 16 | 875 | 12 | 778 | 44 | -12 |
| 1.3192 | 5.5 | | 0.14528 | 2.6 | | | 0.06608 | 4.3 | | 854 | | 16 | 874 | 11 | 809 | 45 | -8 |
| 1.3787 | 8.6 | | 0.14528 | 3.2 | | | 0.07010 | 8.5 | | 880 | | 25 | 874 | 13 | 931 | 87 | 6 |
| 1.3448 | 5.1 | | 0.14519 | 2.7 | | | 0.06714 | 4.0 | | 865 | | 15 | 874 | 11 | 842 | 42 | -4 |
| 1.3084 | 10.0 | | 0.14517 | 4.0 | | | 0.06608 | 9.2 | | 849 | | 29 | 874 | 16 | 809 | 48 | -8 |
| 1.3013 | 5.3 | | 0.14513 | 3.5 | | | 0.06639 | 5.4 | | 846 | | 15 | 874 | 14 | 819 | 56 | -7 |
| 1.3395 | 11.7 | | 0.14512 | 4.0 | | | 0.06625 | 11.7 | | 863 | | 34 | 874 | 17 | 814 | 123 | -7 |
| **Ratios** | | | | | | | | | |  | **Ages** | | | | | | |
| 207Pb  235U | error (2s%) | | 206Pb  238U | error (2s%) | | | 207Pb  206U | error  (2s%) | | 207Pb  235U | | error  (1s abs) | 206Pb  238U | error  (1s abs) | 207Pb  206U | error  (1s abs) | % dis-cordance |
| 1.3007 | 10.1 | | 0.14510 | 4.7 | | | 0.06601 | 9.3 | | 846 | | 29 | 873 | 19 | 807 | 97 | -8 |
| 1.2338 | 10.8 | | 0.14506 | 3.3 | | | 0.06308 | 9.9 | | 816 | | 30 | 873 | 14 | 711 | 105 | -23 |
| 1.3364 | 4.2 | | 0.14483 | 2.9 | | | 0.06732 | 3.3 | | 862 | | 12 | 872 | 12 | 848 | 35 | -3 |
| 1.3566 | 3.3 | | 0.14459 | 1.4 | | | 0.06815 | 3.1 | | 870 | | 10 | 871 | 6 | 873 | 32 | 0 |
| 1.3454 | 5.0 | | 0.14459 | 3.4 | | | 0.06768 | 4.1 | | 866 | | 15 | 871 | 14 | 859 | 43 | -1 |
| 1.2626 | 8.1 | | 0.14454 | 3.8 | | | 0.06299 | 6.9 | | 829 | | 23 | 870 | 16 | 708 | 73 | -23 |
| 1.3044 | 12.0 | | 0.14447 | 3.3 | | | 0.06503 | 11.8 | | 848 | | 34 | 870 | 13 | 775 | 62 | -12 |
| 1.3118 | 6.0 | | 0.14439 | 3.1 | | | 0.06605 | 5.0 | | 851 | | 17 | 869 | 13 | 808 | 52 | -8 |
| 1.3264 | 6.9 | | 0.14432 | 3.0 | | | 0.06891 | 5.1 | | 857 | | 20 | 869 | 12 | 896 | 52 | 3 |
| 1.3488 | 6.0 | | 0.14432 | 3.7 | | | 0.06732 | 5.4 | | 867 | | 17 | 869 | 15 | 848 | 56 | -3 |
| 1.3830 | 9.9 | | 0.14423 | 3.9 | | | 0.07084 | 9.4 | | 882 | | 29 | 869 | 16 | 953 | 96 | 9 |
| 1.3133 | 5.3 | | 0.14422 | 3.5 | | | 0.06615 | 4.2 | | 852 | | 15 | 868 | 14 | 811 | 44 | -7 |
| 1.3144 | 11.5 | | 0.14385 | 4.9 | | | 0.06810 | 8.3 | | 852 | | 33 | 866 | 20 | 872 | 86 | 1 |
| 1.3588 | 16.1 | | 0.14366 | 3.8 | | | 0.07025 | 12.9 | | 871 | | 47 | 865 | 15 | 936 | 133 | 8 |
| 1.3326 | 5.4 | | 0.14351 | 3.0 | | | 0.06876 | 4.9 | | 860 | | 16 | 865 | 12 | 892 | 50 | 3 |
| 1.2753 | 7.4 | | 0.14351 | 3.1 | | | 0.06591 | 6.7 | | 835 | | 21 | 864 | 13 | 804 | 70 | -8 |
| 1.3400 | 13.0 | | 0.14347 | 5.3 | | | 0.06543 | 12.5 | | 863 | | 38 | 864 | 22 | 788 | 66 | -10 |
| 1.3137 | 4.3 | | 0.14337 | 2.5 | | | 0.06622 | 2.8 | | 852 | | 12 | 864 | 10 | 813 | 29 | -6 |
| 1.3119 | 4.0 | | 0.14337 | 2.8 | | | 0.06630 | 3.5 | | 851 | | 12 | 864 | 11 | 816 | 37 | -6 |
| 1.2726 | 6.6 | | 0.14334 | 2.9 | | | 0.06460 | 6.6 | | 834 | | 19 | 864 | 12 | 761 | 70 | -13 |
| 1.2720 | 11.7 | | 0.14328 | 5.7 | | | 0.06450 | 10.4 | | 833 | | 33 | 863 | 23 | 758 | 110 | -14 |
| 1.2968 | 5.3 | | 0.14327 | 3.4 | | | 0.06657 | 4.4 | | 844 | | 15 | 863 | 14 | 824 | 45 | -5 |
| 1.3467 | 4.8 | | 0.14326 | 2.8 | | | 0.06895 | 4.2 | | 866 | | 14 | 863 | 11 | 897 | 43 | 4 |
| 1.2207 | 8.8 | | 0.14323 | 3.0 | | | 0.06382 | 8.2 | | 810 | | 25 | 863 | 12 | 736 | 87 | -17 |
| 1.2362 | 9.7 | | 0.14322 | 6.3 | | | 0.06314 | 8.6 | | 817 | | 27 | 863 | 26 | 713 | 91 | -21 |
| 1.2548 | 5.6 | | 0.14287 | 2.5 | | | 0.06606 | 4.1 | | 826 | | 16 | 861 | 10 | 808 | 43 | -6 |
| 1.3329 | 7.7 | | 0.14279 | 4.1 | | | 0.06931 | 6.9 | | 860 | | 22 | 860 | 17 | 908 | 36 | 5 |
| 1.3438 | 5.0 | | 0.14263 | 3.5 | | | 0.06740 | 4.0 | | 865 | | 15 | 860 | 14 | 850 | 41 | -1 |
| 1.3334 | 5.6 | | 0.14259 | 2.3 | | | 0.06774 | 4.3 | | 860 | | 16 | 859 | 9 | 860 | 45 | 0 |
| 1.2446 | 8.9 | | 0.14247 | 3.8 | | | 0.06480 | 7.5 | | 821 | | 25 | 859 | 15 | 768 | 79 | -12 |
| 1.2599 | 18.4 | | 0.14245 | 5.1 | | | 0.06411 | 18.2 | | 828 | | 52 | 859 | 21 | 745 | 192 | -15 |
| 1.3964 | 4.3 | | 0.14237 | 4.6 | | | 0.07024 | 4.5 | | 887 | | 13 | 858 | 18 | 935 | 46 | 8 |
| 1.2836 | 8.5 | | 0.14233 | 4.0 | | | 0.06709 | 7.7 | | 838 | | 24 | 858 | 16 | 841 | 80 | -2 |
| 1.2436 | 9.7 | | 0.14232 | 3.5 | | | 0.06401 | 7.0 | | 820 | | 27 | 858 | 14 | 742 | 74 | -16 |
| 1.2692 | 5.4 | | 0.14207 | 2.9 | | | 0.06539 | 4.5 | | 832 | | 15 | 856 | 12 | 787 | 47 | -9 |
| 1.2996 | 6.8 | | 0.14181 | 3.6 | | | 0.06684 | 5.4 | | 846 | | 19 | 855 | 14 | 833 | 56 | -3 |
| 1.2990 | 5.2 | | 0.14178 | 3.0 | | | 0.06607 | 4.6 | | 845 | | 15 | 855 | 12 | 808 | 48 | -6 |
| 1.2910 | 6.1 | | 0.14163 | 3.9 | | | 0.06634 | 4.4 | | 842 | | 18 | 854 | 15 | 817 | 46 | -4 |
| 1.3529 | 4.3 | | 0.14161 | 2.8 | | | 0.06824 | 4.1 | | 869 | | 13 | 854 | 11 | 876 | 42 | 3 |
| 1.2476 | 8.3 | | 0.14146 | 3.1 | | | 0.06429 | 6.8 | | 822 | | 23 | 853 | 12 | 751 | 71 | -14 |
| 1.2600 | 7.8 | | 0.14146 | 3.9 | | | 0.06579 | 4.7 | | 828 | | 22 | 853 | 16 | 800 | 49 | -7 |
| 1.2540 | 12.1 | | 0.14145 | 5.6 | | | 0.06560 | 7.7 | | 825 | | 34 | 853 | 23 | 794 | 80 | -7 |
| 1.2783 | 6.2 | | 0.14138 | 3.0 | | | 0.06603 | 6.3 | | 836 | | 18 | 852 | 12 | 807 | 66 | -6 |
| 1.2545 | 6.0 | | 0.14131 | 2.6 | | | 0.06488 | 5.5 | | 825 | | 17 | 852 | 10 | 771 | 57 | -11 |
| 1.3335 | 10.9 | | 0.14127 | 8.4 | | | 0.06985 | 13.1 | | 860 | | 32 | 852 | 34 | 924 | 135 | 8 |
| 1.3096 | 4.7 | | 0.14127 | 3.1 | | | 0.06780 | 3.3 | | 850 | | 14 | 852 | 12 | 863 | 34 | 1 |
| 1.2472 | 3.7 | | 0.14113 | 2.4 | | | 0.06423 | 2.4 | | 822 | | 11 | 851 | 10 | 749 | 25 | -14 |
| 1.3058 | 4.0 | | 0.14111 | 2.9 | | | 0.06685 | 3.9 | | 848 | | 11 | 851 | 11 | 833 | 41 | -2 |
| 1.2392 | 6.7 | | 0.14108 | 2.7 | | | 0.06412 | 5.5 | | 819 | | 19 | 851 | 11 | 746 | 58 | -14 |
| 1.3776 | 9.8 | | 0.14106 | 3.4 | | | 0.07299 | 9.1 | | 879 | | 29 | 851 | 14 | 1014 | 92 | 16 |
| 1.3016 | 12.1 | | 0.14099 | 4.4 | | | 0.06696 | 11.1 | | 846 | | 35 | 850 | 18 | 836 | 116 | -2 |
| 1.2342 | 10.9 | | 0.14091 | 4.3 | | | 0.06234 | 10.7 | | 816 | | 31 | 850 | 17 | 686 | 114 | -24 |
| 1.2959 | 4.5 | | 0.14082 | 3.0 | | | 0.06745 | 3.7 | | 844 | | 13 | 849 | 12 | 852 | 38 | 0 |
| 1.3069 | 7.9 | | 0.14059 | 4.3 | | | 0.06804 | 5.8 | | 849 | | 23 | 848 | 17 | 870 | 60 | 3 |
| 1.2994 | 7.7 | | 0.14051 | 4.1 | | | 0.06902 | 6.9 | | 845 | | 22 | 848 | 16 | 899 | 71 | 6 |
| 1.2190 | 8.3 | | 0.14043 | 6.2 | | | 0.06362 | 10.0 | | 809 | | 23 | 847 | 25 | 729 | 106 | -16 |
| **Ratios** | | | | | | | | | |  | **Ages** | | | | | | |
| 207Pb  235U | error (2s%) | | 206Pb  238U | error (2s%) | | | 207Pb  206U | error  (2s%) | | 207Pb  235U | | error  (1s abs) | 206Pb  238U | error  (1s abs) | 207Pb  206U | error  (1s abs) | % dis-cordance |
| 1.2405 | 6.5 | | 0.14041 | 4.2 | | | 0.06439 | 5.3 | | 819 | | 18 | 847 | 17 | 755 | 56 | -12 |
| 1.3762 | 6.8 | | 0.14018 | 3.3 | | | 0.07088 | 6.1 | | 879 | | 20 | 846 | 13 | 954 | 62 | 11 |
| 1.2604 | 5.7 | | 0.14016 | 3.6 | | | 0.06552 | 4.2 | | 828 | | 16 | 846 | 14 | 791 | 44 | -7 |
| 1.2428 | 9.3 | | 0.14010 | 4.2 | | | 0.06463 | 7.9 | | 820 | | 26 | 845 | 17 | 762 | 83 | -11 |
| 1.2455 | 2.2 | | 0.13981 | 1.0 | | | 0.06508 | 2.2 | | 821 | | 6 | 844 | 4 | 777 | 23 | -9 |
| 1.2632 | 3.9 | | 0.13975 | 3.1 | | | 0.06581 | 2.6 | | 829 | | 11 | 843 | 12 | 800 | 28 | -5 |
| 1.2854 | 4.2 | | 0.13973 | 3.5 | | | 0.06722 | 2.2 | | 839 | | 12 | 843 | 14 | 845 | 23 | 0 |
| 1.3556 | 12.3 | | 0.13966 | 3.6 | | | 0.07014 | 11.5 | | 870 | | 36 | 843 | 14 | 932 | 118 | 10 |
| 1.2435 | 8.4 | | 0.13962 | 3.9 | | | 0.06537 | 6.4 | | 820 | | 24 | 843 | 16 | 786 | 67 | -7 |
| 1.2924 | 5.7 | | 0.13954 | 2.8 | | | 0.06737 | 4.9 | | 842 | | 16 | 842 | 11 | 849 | 51 | 1 |
| 1.3289 | 4.1 | | 0.13950 | 4.5 | | | 0.06851 | 3.7 | | 858 | | 12 | 842 | 18 | 884 | 38 | 5 |
| 1.3453 | 5.0 | | 0.13945 | 3.0 | | | 0.06794 | 4.6 | | 866 | | 15 | 842 | 12 | 867 | 48 | 3 |
| 1.3074 | 6.4 | | 0.13943 | 3.4 | | | 0.06849 | 5.2 | | 849 | | 18 | 841 | 13 | 883 | 54 | 5 |
| 1.2754 | 4.0 | | 0.13934 | 3.3 | | | 0.06678 | 2.5 | | 835 | | 11 | 841 | 13 | 831 | 26 | -1 |
| 1.2698 | 2.6 | | 0.13932 | 1.4 | | | 0.06604 | 2.2 | | 832 | | 7 | 841 | 6 | 808 | 23 | -4 |
| 1.3191 | 6.6 | | 0.13929 | 3.6 | | | 0.07009 | 6.9 | | 854 | | 19 | 841 | 14 | 931 | 71 | 10 |
| 1.1838 | 10.0 | | 0.13926 | 5.7 | | | 0.06247 | 8.4 | | 793 | | 27 | 840 | 23 | 690 | 90 | -22 |
| 1.2470 | 1.9 | | 0.13925 | 1.3 | | | 0.06529 | 1.8 | | 822 | | 5 | 840 | 5 | 784 | 19 | -7 |
| 1.2264 | 15.5 | | 0.13920 | 5.8 | | | 0.06698 | 12.9 | | 813 | | 43 | 840 | 23 | 837 | 67 | 0 |
| 1.2502 | 5.8 | | 0.13912 | 4.2 | | | 0.06481 | 4.4 | | 824 | | 16 | 840 | 17 | 768 | 47 | -9 |
| 1.2506 | 4.3 | | 0.13904 | 2.0 | | | 0.06442 | 3.9 | | 824 | | 12 | 839 | 8 | 755 | 41 | -11 |
| 1.2371 | 10.1 | | 0.13886 | 5.2 | | | 0.06492 | 6.8 | | 818 | | 28 | 838 | 20 | 772 | 72 | -9 |
| 1.2361 | 7.9 | | 0.13886 | 3.9 | | | 0.06560 | 6.9 | | 817 | | 22 | 838 | 15 | 794 | 72 | -6 |
| 1.2388 | 4.3 | | 0.13881 | 2.6 | | | 0.06569 | 4.1 | | 818 | | 12 | 838 | 10 | 797 | 43 | -5 |
| 1.2440 | 10.7 | | 0.13865 | 4.5 | | | 0.06658 | 9.5 | | 821 | | 30 | 837 | 18 | 825 | 99 | -1 |
| 1.3318 | 5.3 | | 0.13857 | 5.5 | | | 0.06748 | 5.2 | | 860 | | 15 | 837 | 21 | 853 | 54 | 2 |
| 1.2416 | 3.7 | | 0.13851 | 1.9 | | | 0.06533 | 3.2 | | 820 | | 10 | 836 | 7 | 785 | 33 | -7 |
| 1.2116 | 6.0 | | 0.13843 | 3.8 | | | 0.06431 | 3.8 | | 806 | | 17 | 836 | 15 | 752 | 40 | -11 |
| 1.1938 | 6.4 | | 0.13834 | 2.1 | | | 0.06473 | 4.5 | | 798 | | 18 | 835 | 8 | 766 | 47 | -9 |
| 1.1789 | 6.2 | | 0.13832 | 3.2 | | | 0.06343 | 4.6 | | 791 | | 17 | 835 | 13 | 723 | 48 | -16 |
| 1.2467 | 6.9 | | 0.13830 | 3.5 | | | 0.06445 | 6.5 | | 822 | | 19 | 835 | 14 | 756 | 69 | -10 |
| 1.1759 | 14.3 | | 0.13806 | 3.6 | | | 0.06276 | 14.0 | | 789 | | 39 | 834 | 14 | 700 | 150 | -19 |
| 1.2636 | 9.1 | | 0.13802 | 3.6 | | | 0.06588 | 9.1 | | 830 | | 26 | 833 | 14 | 802 | 96 | -4 |
| 1.2407 | 3.0 | | 0.13797 | 1.2 | | | 0.06555 | 3.1 | | 819 | | 8 | 833 | 5 | 792 | 32 | -5 |
| 1.2851 | 3.8 | | 0.13795 | 2.9 | | | 0.06778 | 3.6 | | 839 | | 11 | 833 | 11 | 862 | 37 | 3 |
| 1.2998 | 8.1 | | 0.13788 | 7.5 | | | 0.06851 | 4.7 | | 846 | | 23 | 833 | 29 | 884 | 49 | 6 |
| 1.2172 | 6.2 | | 0.13785 | 3.3 | | | 0.06382 | 4.7 | | 808 | | 17 | 832 | 13 | 736 | 50 | -13 |
| 1.2225 | 13.4 | | 0.13783 | 4.7 | | | 0.06468 | 11.8 | | 811 | | 37 | 832 | 18 | 764 | 125 | -9 |
| 1.3107 | 6.8 | | 0.13781 | 3.2 | | | 0.07065 | 6.1 | | 850 | | 20 | 832 | 12 | 947 | 62 | 12 |
| 1.2570 | 7.9 | | 0.13775 | 4.1 | | | 0.06503 | 6.5 | | 827 | | 22 | 832 | 16 | 775 | 68 | -7 |
| 1.1850 | 7.9 | | 0.13758 | 4.0 | | | 0.06210 | 7.1 | | 794 | | 22 | 831 | 15 | 677 | 76 | -23 |
| 1.2671 | 5.8 | | 0.13756 | 3.3 | | | 0.06614 | 5.0 | | 831 | | 16 | 831 | 13 | 811 | 53 | -2 |
| 1.2174 | 8.4 | | 0.13753 | 2.9 | | | 0.06457 | 8.2 | | 809 | | 23 | 831 | 11 | 760 | 87 | -9 |
| 1.3336 | 13.7 | | 0.13746 | 6.1 | | | 0.07108 | 12.2 | | 860 | | 40 | 830 | 24 | 960 | 124 | 13 |
| 1.3520 | 12.7 | | 0.13725 | 4.9 | | | 0.07173 | 11.9 | | 868 | | 37 | 829 | 19 | 978 | 121 | 15 |
| 1.2469 | 7.8 | | 0.13717 | 3.4 | | | 0.06570 | 7.2 | | 822 | | 22 | 829 | 13 | 797 | 75 | -4 |
| 1.2502 | 19.3 | | 0.13713 | 6.1 | | | 0.06603 | 19.5 | | 824 | | 54 | 828 | 24 | 807 | 102 | -3 |
| 1.2652 | 9.2 | | 0.13704 | 4.1 | | | 0.06719 | 7.1 | | 830 | | 26 | 828 | 16 | 844 | 73 | 2 |
| 1.2197 | 1.8 | | 0.13674 | 1.0 | | | 0.06495 | 1.7 | | 810 | | 5 | 826 | 4 | 773 | 18 | -7 |
| 1.1629 | 13.2 | | 0.13665 | 7.2 | | | 0.06220 | 6.7 | | 783 | | 36 | 826 | 28 | 681 | 72 | -21 |
| 1.3163 | 7.6 | | 0.13649 | 3.9 | | | 0.07039 | 6.1 | | 853 | | 22 | 825 | 15 | 940 | 63 | 12 |
| 1.1962 | 5.9 | | 0.13644 | 3.8 | | | 0.06364 | 4.1 | | 799 | | 16 | 825 | 15 | 730 | 43 | -13 |
| 1.2878 | 5.6 | | 0.13637 | 5.7 | | | 0.06801 | 4.9 | | 840 | | 16 | 824 | 22 | 869 | 51 | 5 |
| 1.1797 | 8.0 | | 0.13620 | 3.4 | | | 0.06323 | 7.2 | | 791 | | 22 | 823 | 13 | 716 | 76 | -15 |
| 1.1853 | 10.1 | | 0.13618 | 4.3 | | | 0.06417 | 9.3 | | 794 | | 28 | 823 | 17 | 747 | 98 | -10 |
| 1.2180 | 6.9 | | 0.13617 | 3.1 | | | 0.06398 | 6.9 | | 809 | | 19 | 823 | 12 | 741 | 73 | -11 |
| **Ratios** | | | | | | | | | |  | **Ages** | | | | | | |
| 207Pb  235U | error (2s%) | | 206Pb  238U | error (2s%) | | | 207Pb  206U | error  (2s%) | | 207Pb  235U | | error  (1s abs) | 206Pb  238U | error  (1s abs) | 207Pb  206U | error  (1s abs) | % dis-cordance |
| 1.1740 | 16.2 | | 0.13605 | 7.1 | | | 0.06161 | 15.5 | | 789 | | 44 | 822 | 27 | 661 | 166 | -24 |
| 1.2827 | 7.1 | | 0.13604 | 3.5 | | | 0.07039 | 6.4 | | 838 | | 20 | 822 | 13 | 940 | 65 | 13 |
| 1.2935 | 10.2 | | 0.13595 | 4.2 | | | 0.06861 | 9.9 | | 843 | | 29 | 822 | 16 | 887 | 102 | 7 |
| 1.2374 | 7.9 | | 0.13594 | 2.8 | | | 0.06593 | 6.2 | | 818 | | 22 | 822 | 11 | 804 | 65 | -2 |
| 1.3004 | 3.3 | | 0.13590 | 2.6 | | | 0.06969 | 3.2 | | 846 | | 9 | 821 | 10 | 919 | 33 | 11 |
| 1.2860 | 3.9 | | 0.13589 | 6.7 | | | 0.06572 | 3.5 | | 840 | | 11 | 821 | 26 | 797 | 36 | -3 |
| 1.2002 | 6.7 | | 0.13581 | 2.7 | | | 0.06383 | 6.4 | | 801 | | 19 | 821 | 10 | 736 | 67 | -12 |
| 1.1968 | 7.2 | | 0.13576 | 3.4 | | | 0.06395 | 5.8 | | 799 | | 20 | 821 | 13 | 740 | 61 | -11 |
| 1.2073 | 8.3 | | 0.13558 | 5.5 | | | 0.06554 | 5.0 | | 804 | | 23 | 820 | 21 | 792 | 53 | -4 |
| 1.2510 | 13.5 | | 0.13523 | 4.5 | | | 0.06841 | 13.0 | | 824 | | 38 | 818 | 17 | 881 | 135 | 7 |
| 1.2103 | 12.6 | | 0.13510 | 6.7 | | | 0.06640 | 9.5 | | 805 | | 35 | 817 | 26 | 819 | 100 | 0 |
| 1.2806 | 6.4 | | 0.13488 | 5.6 | | | 0.06638 | 6.3 | | 837 | | 18 | 816 | 22 | 818 | 66 | 0 |
| 1.2240 | 18.6 | | 0.13455 | 4.6 | | | 0.06568 | 18.7 | | 812 | | 52 | 814 | 17 | 796 | 196 | -2 |
| 1.2227 | 4.6 | | 0.13455 | 2.1 | | | 0.06625 | 3.4 | | 811 | | 13 | 814 | 8 | 814 | 36 | 0 |
| 1.1920 | 6.1 | | 0.13453 | 2.6 | | | 0.06407 | 6.4 | | 797 | | 17 | 814 | 10 | 744 | 68 | -9 |
| 1.1603 | 9.4 | | 0.13396 | 4.6 | | | 0.06255 | 8.9 | | 782 | | 26 | 810 | 17 | 693 | 95 | -17 |
| 1.2232 | 14.2 | | 0.13394 | 6.2 | | | 0.06649 | 14.0 | | 811 | | 40 | 810 | 24 | 822 | 147 | 1 |
| 1.1687 | 6.4 | | 0.13343 | 3.8 | | | 0.06402 | 4.9 | | 786 | | 18 | 807 | 15 | 742 | 52 | -9 |
| 1.2554 | 6.7 | | 0.13342 | 3.1 | | | 0.06926 | 5.5 | | 826 | | 19 | 807 | 12 | 906 | 56 | 11 |
| 1.2923 | 13.7 | | 0.13327 | 4.6 | | | 0.07170 | 13.2 | | 842 | | 39 | 806 | 18 | 977 | 134 | 17 |
| 1.2505 | 5.3 | | 0.13310 | 3.1 | | | 0.06861 | 3.7 | | 824 | | 15 | 805 | 12 | 887 | 38 | 9 |
| 1.1886 | 4.4 | | 0.13299 | 2.8 | | | 0.06416 | 4.1 | | 795 | | 12 | 805 | 10 | 747 | 44 | -8 |
| 1.1071 | 7.7 | | 0.13289 | 3.4 | | | 0.06243 | 6.9 | | 757 | | 20 | 804 | 13 | 689 | 74 | -17 |
| 1.2461 | 7.5 | | 0.13289 | 3.2 | | | 0.06836 | 6.8 | | 822 | | 21 | 804 | 12 | 880 | 70 | 9 |
| 1.1973 | 13.5 | | 0.13286 | 6.0 | | | 0.06466 | 12.0 | | 799 | | 37 | 804 | 23 | 763 | 127 | -5 |
| 1.1565 | 4.8 | | 0.13285 | 4.9 | | | 0.06343 | 3.5 | | 780 | | 13 | 804 | 19 | 723 | 37 | -11 |
| 1.2161 | 5.8 | | 0.13279 | 3.5 | | | 0.06710 | 5.9 | | 808 | | 16 | 804 | 13 | 841 | 61 | 4 |
| 1.1916 | 4.5 | | 0.13261 | 2.5 | | | 0.06429 | 3.5 | | 797 | | 12 | 803 | 10 | 751 | 37 | -7 |
| 1.1916 | 4.5 | | 0.13261 | 2.5 | | | 0.06429 | 3.5 | | 797 | | 12 | 803 | 10 | 751 | 37 | -7 |
| 1.1620 | 12.5 | | 0.13251 | 6.1 | | | 0.06299 | 10.7 | | 783 | | 34 | 802 | 23 | 708 | 114 | -13 |
| 1.1709 | 11.8 | | 0.13247 | 5.2 | | | 0.06238 | 10.7 | | 787 | | 32 | 802 | 20 | 687 | 114 | -17 |
| 1.3090 | 13.5 | | 0.13247 | 7.4 | | | 0.07099 | 10.6 | | 850 | | 39 | 802 | 28 | 957 | 54 | 16 |
| 1.2068 | 9.0 | | 0.13241 | 5.4 | | | 0.06630 | 6.6 | | 804 | | 25 | 802 | 20 | 816 | 69 | 2 |
| 1.1844 | 7.9 | | 0.13233 | 3.3 | | | 0.06498 | 8.4 | | 793 | | 22 | 801 | 13 | 774 | 89 | -4 |
| 1.1582 | 4.9 | | 0.13231 | 3.1 | | | 0.06398 | 3.3 | | 781 | | 13 | 801 | 12 | 741 | 35 | -8 |
| 1.2546 | 8.0 | | 0.13226 | 7.3 | | | 0.06799 | 4.4 | | 825 | | 23 | 801 | 27 | 868 | 45 | 8 |
| 1.1800 | 5.5 | | 0.13220 | 3.1 | | | 0.06434 | 5.1 | | 791 | | 15 | 800 | 12 | 753 | 54 | -6 |
| 1.2076 | 18.8 | | 0.13186 | 4.9 | | | 0.06762 | 17.1 | | 804 | | 52 | 798 | 18 | 857 | 178 | 7 |
| 1.1101 | 7.2 | | 0.13178 | 2.9 | | | 0.06124 | 6.1 | | 758 | | 19 | 798 | 11 | 648 | 65 | -23 |
| 1.1741 | 4.3 | | 0.13163 | 3.0 | | | 0.06467 | 3.2 | | 789 | | 12 | 797 | 11 | 764 | 34 | -4 |
| 1.1556 | 3.3 | | 0.13125 | 3.1 | | | 0.06410 | 2.5 | | 780 | | 9 | 795 | 12 | 745 | 26 | -7 |
| 1.1350 | 10.3 | | 0.13123 | 3.6 | | | 0.06443 | 10.1 | | 770 | | 28 | 795 | 13 | 756 | 106 | -5 |
| 1.1652 | 10.6 | | 0.13097 | 4.4 | | | 0.06438 | 8.8 | | 784 | | 29 | 793 | 16 | 754 | 93 | -5 |
| 1.1717 | 6.6 | | 0.13085 | 3.2 | | | 0.06598 | 6.3 | | 787 | | 18 | 793 | 12 | 806 | 66 | 2 |
| 1.1670 | 7.9 | | 0.13079 | 5.6 | | | 0.06460 | 6.2 | | 785 | | 22 | 792 | 21 | 761 | 66 | -4 |
| 1.2081 | 8.2 | | 0.13073 | 3.0 | | | 0.06563 | 7.7 | | 804 | | 23 | 792 | 11 | 795 | 81 | 0 |
| 1.1759 | 1.8 | | 0.13056 | 1.3 | | | 0.06511 | 1.6 | | 789 | | 5 | 791 | 5 | 778 | 17 | -2 |
| 1.1973 | 7.9 | | 0.13052 | 3.6 | | | 0.06661 | 6.9 | | 799 | | 22 | 791 | 14 | 826 | 36 | 4 |
| 1.1433 | 3.5 | | 0.12983 | 1.6 | | | 0.06416 | 3.2 | | 774 | | 9 | 787 | 6 | 747 | 33 | -5 |
| 1.1676 | 12.8 | | 0.12956 | 5.1 | | | 0.06529 | 12.3 | | 786 | | 35 | 785 | 19 | 784 | 129 | 0 |
| 1.1620 | 11.3 | | 0.12953 | 6.2 | | | 0.06471 | 11.0 | | 783 | | 31 | 785 | 23 | 765 | 116 | -3 |
| 1.1020 | 7.5 | | 0.12945 | 4.7 | | | 0.06253 | 5.0 | | 754 | | 20 | 785 | 18 | 692 | 54 | -13 |
| 1.1550 | 8.2 | | 0.12939 | 1.8 | | | 0.06731 | 4.2 | | 780 | | 22 | 784 | 7 | 847 | 44 | 7 |
| 1.1863 | 7.4 | | 0.12939 | 3.1 | | | 0.06715 | 7.0 | | 794 | | 20 | 784 | 12 | 843 | 73 | 7 |
| 1.1160 | 4.6 | | 0.12919 | 3.1 | | | 0.06267 | 3.0 | | 761 | | 12 | 783 | 11 | 697 | 32 | -12 |
| 1.1467 | 2.0 | | 0.12918 | 1.5 | | | 0.06420 | 1.1 | | 776 | | 5 | 783 | 5 | 748 | 12 | -5 |
| **Ratios** | | | | | | | | | |  | **Ages** | | | | | | |
| 207Pb  235U | error (2s%) | | 206Pb  238U | error (2s%) | | | 207Pb  206U | error  (2s%) | | 207Pb  235U | | error  (1s abs) | 206Pb  238U | error  (1s abs) | 207Pb  206U | error  (1s abs) | % dis-cordance |
| 1.1667 | 6.7 | | 0.12897 | 3.4 | | | 0.06562 | 6.0 | | 785 | | 18 | 782 | 13 | 794 | 63 | 2 |
| 1.1456 | 6.4 | | 0.12877 | 4.7 | | | 0.06484 | 3.7 | | 775 | | 17 | 781 | 17 | 769 | 39 | -2 |
| 1.1572 | 8.7 | | 0.12853 | 5.2 | | | 0.06570 | 5.8 | | 781 | | 24 | 779 | 19 | 797 | 61 | 2 |
| 1.2096 | 2.4 | | 0.12814 | 1.7 | | | 0.06813 | 2.3 | | 805 | | 7 | 777 | 6 | 872 | 24 | 11 |
| 1.2297 | 7.3 | | 0.12787 | 3.9 | | | 0.07018 | 6.7 | | 814 | | 20 | 776 | 14 | 934 | 34 | 17 |
| 1.1216 | 8.6 | | 0.12775 | 4.6 | | | 0.06157 | 7.7 | | 764 | | 23 | 775 | 17 | 659 | 83 | -18 |
| 1.2339 | 7.7 | | 0.12771 | 3.6 | | | 0.07097 | 6.2 | | 816 | | 22 | 775 | 13 | 957 | 63 | 19 |
| 1.1663 | 5.7 | | 0.12770 | 3.6 | | | 0.06623 | 4.1 | | 785 | | 15 | 775 | 13 | 814 | 43 | 5 |
| 1.1442 | 11.3 | | 0.12760 | 4.6 | | | 0.06500 | 11.3 | | 774 | | 31 | 774 | 17 | 774 | 119 | 0 |
| 1.1077 | 7.7 | | 0.12746 | 4.0 | | | 0.06332 | 5.9 | | 757 | | 20 | 773 | 15 | 719 | 63 | -8 |
| 1.1645 | 13.0 | | 0.12721 | 5.9 | | | 0.06500 | 12.1 | | 784 | | 36 | 772 | 22 | 774 | 128 | 0 |
| 1.1857 | 3.7 | | 0.12701 | 2.1 | | | 0.06838 | 3.3 | | 794 | | 10 | 771 | 7 | 880 | 34 | 12 |
| 1.1209 | 7.6 | | 0.12699 | 4.3 | | | 0.06318 | 6.0 | | 763 | | 20 | 771 | 16 | 714 | 64 | -8 |
| 1.1243 | 4.2 | | 0.12689 | 3.2 | | | 0.06430 | 3.8 | | 765 | | 11 | 770 | 12 | 751 | 40 | -2 |
| 1.1551 | 1.7 | | 0.12663 | 1.4 | | | 0.06614 | 1.1 | | 780 | | 5 | 769 | 5 | 811 | 11 | 5 |
| 1.0492 | 3.2 | | 0.12649 | 1.9 | | | 0.06035 | 3.2 | | 728 | | 8 | 768 | 7 | 616 | 35 | -25 |
| 1.1028 | 5.8 | | 0.12629 | 4.5 | | | 0.06271 | 4.6 | | 755 | | 15 | 767 | 16 | 698 | 49 | -10 |
| 1.0353 | 10.2 | | 0.12622 | 3.3 | | | 0.06043 | 7.5 | | 722 | | 26 | 766 | 12 | 619 | 81 | -24 |
| 1.1414 | 5.4 | | 0.12592 | 3.9 | | | 0.06608 | 4.0 | | 773 | | 15 | 765 | 14 | 809 | 42 | 5 |
| 1.1181 | 4.2 | | 0.12571 | 3.0 | | | 0.06426 | 3.1 | | 762 | | 11 | 763 | 11 | 750 | 33 | -2 |
| 1.1085 | 6.9 | | 0.12528 | 4.1 | | | 0.06369 | 6.2 | | 757 | | 18 | 761 | 15 | 731 | 66 | -4 |
| 1.0587 | 6.6 | | 0.12524 | 4.8 | | | 0.06204 | 6.1 | | 733 | | 17 | 761 | 17 | 675 | 65 | -13 |
| 1.0437 | 3.9 | | 0.12463 | 1.6 | | | 0.06093 | 4.0 | | 726 | | 10 | 757 | 6 | 637 | 43 | -19 |
| 1.1262 | 11.3 | | 0.12451 | 7.3 | | | 0.06734 | 5.8 | | 766 | | 30 | 756 | 26 | 848 | 61 | 11 |
| 1.0474 | 6.9 | | 0.12421 | 5.2 | | | 0.06110 | 5.6 | | 728 | | 18 | 755 | 18 | 643 | 60 | -17 |
| 1.1057 | 5.8 | | 0.12300 | 4.5 | | | 0.06574 | 3.9 | | 756 | | 15 | 748 | 16 | 798 | 40 | 6 |
| 1.1080 | 3.5 | | 0.12265 | 2.4 | | | 0.06565 | 2.0 | | 757 | | 9 | 746 | 9 | 795 | 21 | 6 |
| 1.0990 | 3.3 | | 0.12225 | 2.0 | | | 0.06572 | 2.6 | | 753 | | 9 | 743 | 7 | 797 | 28 | 7 |
| 1.0649 | 12.3 | | 0.12189 | 8.0 | | | 0.06521 | 6.8 | | 736 | | 32 | 741 | 28 | 781 | 71 | 5 |
| 1.0480 | 7.2 | | 0.12125 | 5.7 | | | 0.06288 | 3.7 | | 728 | | 19 | 738 | 20 | 704 | 40 | -5 |
| 1.0498 | 4.1 | | 0.12100 | 2.6 | | | 0.06373 | 2.9 | | 729 | | 11 | 736 | 9 | 733 | 31 | -1 |
| 1.0021 | 14.9 | | 0.12035 | 5.0 | | | 0.05998 | 13.8 | | 705 | | 38 | 733 | 17 | 603 | 149 | -22 |
| 1.0901 | 7.2 | | 0.11952 | 5.8 | | | 0.06588 | 5.4 | | 749 | | 19 | 728 | 20 | 803 | 57 | 9 |
| 1.1039 | 9.5 | | 0.11870 | 9.8 | | | 0.06681 | 5.0 | | 755 | | 25 | 723 | 33 | 832 | 52 | 13 |
| 1.0281 | 13.9 | | 0.11784 | 6.0 | | | 0.06308 | 12.6 | | 718 | | 36 | 718 | 20 | 711 | 134 | -1 |
| 1.0063 | 7.8 | | 0.11702 | 4.2 | | | 0.06281 | 6.7 | | 707 | | 20 | 713 | 14 | 702 | 71 | -2 |
| 1.0646 | 4.6 | | 0.11690 | 4.3 | | | 0.06535 | 3.8 | | 736 | | 12 | 713 | 14 | 786 | 40 | 9 |
| 0.9885 | 6.9 | | 0.11543 | 3.8 | | | 0.06299 | 5.3 | | 698 | | 17 | 704 | 13 | 708 | 56 | 1 |
| 0.9511 | 10.3 | | 0.11428 | 7.3 | | | 0.06087 | 5.6 | | 679 | | 25 | 698 | 24 | 635 | 60 | -10 |
| 0.9440 | 8.0 | | 0.11398 | 5.8 | | | 0.06010 | 4.4 | | 675 | | 20 | 696 | 19 | 607 | 48 | -15 |
| 1.0061 | 4.0 | | 0.11388 | 5.8 | | | 0.06246 | 3.1 | | 707 | | 10 | 695 | 19 | 690 | 33 | -1 |
| 0.9568 | 5.9 | | 0.11329 | 8.9 | | | 0.06020 | 4.1 | | 682 | | 15 | 692 | 29 | 611 | 44 | -13 |
| 0.9693 | 8.3 | | 0.11147 | 3.6 | | | 0.06458 | 8.1 | | 688 | | 21 | 681 | 12 | 761 | 85 | 10 |
| 0.9559 | 8.8 | | 0.11046 | 5.2 | | | 0.06348 | 5.1 | | 681 | | 22 | 675 | 17 | 724 | 55 | 7 |
| 0.9152 | 10.4 | | 0.10593 | 8.5 | | | 0.06372 | 5.3 | | 660 | | 25 | 649 | 26 | 732 | 56 | 11 |
| 0.9744 | 11.4 | | 0.10534 | 8.1 | | | 0.06503 | 9.3 | | 691 | | 29 | 646 | 25 | 775 | 98 | 17 |
| 0.9332 | 3.0 | | 0.10379 | 2.7 | | | 0.06492 | 2.0 | | 669 | | 7 | 637 | 8 | 772 | 21 | 18 |
| 0.9713 | 8.6 | | 0.10373 | 9.1 | | | 0.06703 | 4.2 | | 689 | | 21 | 636 | 27 | 839 | 43 | 24 |
|  |  | |  |  | | |  |  | |  | |  |  |  |  |  |  |
| **Masirah Bay Formation (Khufai Dome, Huqf)** | | | | | | | |  | |  | |  |  |  |  |  |  |
| 9.9305 | 7.1 | | 0.47170 | 5.8 | | | 0.15315 | 4.7 | | 2428 | | 33 | 2491 | 60 | 2381 | 40 | -5 |
| 8.3090 | 4.8 | | 0.42450 | 2.9 | | | 0.14240 | 2.8 | | 2265 | | 22 | 2281 | 28 | 2257 | 25 | -1 |
| 6.9206 | 3.5 | | 0.38043 | 2.8 | | | 0.13019 | 2.9 | | 2101 | | 16 | 2078 | 25 | 2101 | 26 | 1 |
| 5.9296 | 4.4 | | 0.36744 | 3.5 | | | 0.11577 | 3.2 | | 1966 | | 19 | 2017 | 30 | 1892 | 29 | -7 |
| 5.1475 | 11.4 | | 0.33929 | 7.6 | | | 0.11133 | 5.4 | | 1844 | | 48 | 1883 | 62 | 1821 | 49 | -3 |
| 4.9764 | 4.8 | | 0.32222 | 4.0 | | | 0.11183 | 2.3 | | 1815 | | 20 | 1801 | 31 | 1829 | 21 | 2 |
| **Ratios** | | | | | | | | | |  | **Ages** | | | | | | |
| 207Pb  235U | error (2s%) | | 206Pb  238U | error (2s%) | | | 207Pb  206U | error  (2s%) | | 207Pb  235U | | error  (1s abs) | 206Pb  238U | error  (1s abs) | 207Pb  206U | error  (1s abs) | % dis-cordance |
| 4.5271 | 4.9 | | 0.31911 | 3.7 | | | 0.10362 | 2.4 | | 1736 | | 20 | 1785 | 29 | 1690 | 22 | -6 |
| 2.2449 | 4.9 | | 0.20749 | 3.2 | | | 0.07779 | 4.3 | | 1195 | | 17 | 1215 | 18 | 1141 | 43 | -6 |
| 1.4561 | 7.2 | | 0.15487 | 5.0 | | | 0.06883 | 4.4 | | 912 | | 22 | 928 | 22 | 894 | 46 | -4 |
| 1.3918 | 7.9 | | 0.15392 | 6.8 | | | 0.06555 | 12.4 | | 885 | | 23 | 923 | 29 | 792 | 130 | -17 |
| 1.3285 | 4.8 | | 0.14960 | 2.6 | | | 0.06485 | 4.4 | | 858 | | 14 | 899 | 11 | 769 | 47 | -17 |
| 1.4326 | 7.7 | | 0.14626 | 7.1 | | | 0.06992 | 9.1 | | 903 | | 23 | 880 | 29 | 926 | 93 | 5 |
| 1.2650 | 11.5 | | 0.14487 | 3.8 | | | 0.06398 | 10.4 | | 830 | | 33 | 872 | 15 | 741 | 110 | -18 |
| 1.3080 | 7.0 | | 0.14378 | 4.2 | | | 0.06630 | 5.4 | | 849 | | 20 | 866 | 17 | 816 | 56 | -6 |
| 1.2808 | 6.3 | | 0.14318 | 3.2 | | | 0.06491 | 5.4 | | 837 | | 18 | 863 | 13 | 771 | 56 | -12 |
| 1.3387 | 6.5 | | 0.14254 | 3.6 | | | 0.06795 | 4.8 | | 863 | | 19 | 859 | 14 | 867 | 50 | 1 |
| 1.2473 | 6.8 | | 0.14244 | 3.2 | | | 0.06414 | 5.2 | | 822 | | 19 | 858 | 13 | 746 | 55 | -15 |
| 1.2782 | 5.5 | | 0.14204 | 2.1 | | | 0.06599 | 5.5 | | 836 | | 16 | 856 | 8 | 806 | 57 | -6 |
| 1.3084 | 8.1 | | 0.14139 | 4.7 | | | 0.06714 | 7.2 | | 849 | | 23 | 852 | 19 | 842 | 75 | -1 |
| 1.2375 | 9.3 | | 0.14091 | 5.0 | | | 0.06392 | 7.2 | | 818 | | 26 | 850 | 20 | 739 | 76 | -15 |
| 1.2356 | 8.7 | | 0.13965 | 7.1 | | | 0.06485 | 6.6 | | 817 | | 24 | 843 | 28 | 769 | 69 | -10 |
| 1.2476 | 6.8 | | 0.13910 | 3.2 | | | 0.06595 | 5.2 | | 822 | | 19 | 840 | 13 | 805 | 55 | -4 |
| 1.3402 | 3.6 | | 0.13885 | 2.2 | | | 0.06995 | 4.2 | | 863 | | 10 | 838 | 9 | 927 | 43 | 10 |
| 1.3411 | 11.7 | | 0.13874 | 8.3 | | | 0.06925 | 11.2 | | 864 | | 34 | 838 | 33 | 906 | 115 | 8 |
| 1.4234 | 5.6 | | 0.13864 | 5.2 | | | 0.07517 | 5.5 | | 899 | | 17 | 837 | 20 | 1073 | 55 | 22 |
| 1.2486 | 6.8 | | 0.13834 | 5.6 | | | 0.06528 | 6.7 | | 823 | | 19 | 835 | 22 | 783 | 70 | -7 |
| 1.2313 | 7.3 | | 0.13814 | 4.6 | | | 0.06466 | 5.6 | | 815 | | 20 | 834 | 18 | 763 | 59 | -9 |
| 1.2344 | 6.5 | | 0.13783 | 5.4 | | | 0.06491 | 4.6 | | 816 | | 18 | 832 | 21 | 771 | 48 | -8 |
| 1.2596 | 9.1 | | 0.13760 | 3.4 | | | 0.06678 | 9.4 | | 828 | | 26 | 831 | 13 | 831 | 98 | 0 |
| 1.2539 | 5.3 | | 0.13731 | 3.3 | | | 0.06525 | 4.0 | | 825 | | 15 | 829 | 13 | 782 | 42 | -6 |
| 1.2252 | 4.8 | | 0.13691 | 3.1 | | | 0.06431 | 4.2 | | 812 | | 14 | 827 | 12 | 752 | 44 | -10 |
| 1.2635 | 11.2 | | 0.13616 | 5.0 | | | 0.06659 | 10.0 | | 829 | | 32 | 823 | 19 | 825 | 104 | 0 |
| 1.2151 | 8.2 | | 0.13606 | 2.4 | | | 0.06442 | 7.8 | | 808 | | 23 | 822 | 9 | 755 | 83 | -9 |
| 1.2316 | 6.9 | | 0.13574 | 3.2 | | | 0.06690 | 5.8 | | 815 | | 19 | 821 | 12 | 835 | 61 | 2 |
| 1.2872 | 3.8 | | 0.13559 | 2.8 | | | 0.07022 | 3.2 | | 840 | | 11 | 820 | 11 | 935 | 33 | 12 |
| 1.2470 | 9.8 | | 0.13551 | 4.6 | | | 0.06740 | 7.7 | | 822 | | 28 | 819 | 18 | 850 | 80 | 4 |
| 1.1902 | 9.4 | | 0.13551 | 4.4 | | | 0.06392 | 8.0 | | 796 | | 26 | 819 | 17 | 739 | 85 | -11 |
| 1.2538 | 7.7 | | 0.13545 | 4.5 | | | 0.06781 | 6.1 | | 825 | | 22 | 819 | 17 | 863 | 63 | 5 |
| 1.2131 | 12.1 | | 0.13531 | 9.5 | | | 0.06664 | 11.6 | | 807 | | 34 | 818 | 37 | 827 | 121 | 1 |
| 1.1882 | 8.1 | | 0.13527 | 4.6 | | | 0.06332 | 7.3 | | 795 | | 22 | 818 | 18 | 719 | 78 | -14 |
| 1.2000 | 7.3 | | 0.13514 | 3.5 | | | 0.06468 | 5.7 | | 801 | | 20 | 817 | 14 | 764 | 60 | -7 |
| 1.1879 | 6.9 | | 0.13506 | 3.6 | | | 0.06428 | 5.9 | | 795 | | 19 | 817 | 14 | 751 | 62 | -9 |
| 1.2149 | 6.5 | | 0.13481 | 5.6 | | | 0.06535 | 3.6 | | 807 | | 18 | 815 | 21 | 786 | 37 | -4 |
| 1.1765 | 7.9 | | 0.13422 | 4.0 | | | 0.06337 | 6.6 | | 790 | | 22 | 812 | 15 | 721 | 70 | -13 |
| 1.2001 | 10.4 | | 0.13411 | 6.2 | | | 0.06680 | 16.4 | | 801 | | 29 | 811 | 24 | 831 | 171 | 2 |
| 1.1544 | 7.7 | | 0.13405 | 4.1 | | | 0.06208 | 6.6 | | 779 | | 21 | 811 | 16 | 677 | 70 | -20 |
| 1.3033 | 7.9 | | 0.13388 | 6.8 | | | 0.06814 | 5.7 | | 847 | | 23 | 810 | 26 | 873 | 59 | 7 |
| 1.2884 | 13.5 | | 0.13374 | 5.3 | | | 0.07096 | 10.2 | | 841 | | 39 | 809 | 20 | 956 | 105 | 15 |
| 1.1766 | 9.3 | | 0.13367 | 4.6 | | | 0.06410 | 9.2 | | 790 | | 26 | 809 | 17 | 745 | 97 | -9 |
| 1.1821 | 8.1 | | 0.13362 | 4.0 | | | 0.06526 | 7.8 | | 792 | | 22 | 808 | 15 | 783 | 82 | -3 |
| 1.1704 | 9.7 | | 0.13280 | 4.0 | | | 0.06390 | 9.6 | | 787 | | 26 | 804 | 15 | 738 | 102 | -9 |
| 1.1765 | 11.2 | | 0.13265 | 5.1 | | | 0.06366 | 8.7 | | 790 | | 31 | 803 | 19 | 731 | 92 | -10 |
| 1.3071 | 12.8 | | 0.13262 | 5.5 | | | 0.07146 | 12.9 | | 849 | | 37 | 803 | 21 | 971 | 132 | 17 |
| 1.1315 | 7.8 | | 0.13258 | 3.1 | | | 0.06216 | 6.1 | | 768 | | 21 | 803 | 12 | 680 | 65 | -18 |
| 1.1570 | 6.5 | | 0.13239 | 3.8 | | | 0.06408 | 5.3 | | 781 | | 18 | 802 | 14 | 744 | 56 | -8 |
| 1.1626 | 12.8 | | 0.13216 | 8.5 | | | 0.06256 | 11.2 | | 783 | | 35 | 800 | 32 | 693 | 119 | -15 |
| 1.1776 | 11.8 | | 0.13155 | 3.8 | | | 0.06549 | 9.6 | | 790 | | 32 | 797 | 14 | 790 | 101 | -1 |
| 1.1988 | 5.0 | | 0.13084 | 3.0 | | | 0.06637 | 4.2 | | 800 | | 14 | 793 | 11 | 818 | 44 | 3 |
| 1.3041 | 10.2 | | 0.13072 | 4.5 | | | 0.07212 | 9.5 | | 848 | | 29 | 792 | 17 | 989 | 96 | 20 |
| 1.2126 | 8.2 | | 0.13061 | 4.5 | | | 0.06660 | 7.7 | | 806 | | 23 | 791 | 17 | 825 | 81 | 4 |
| 1.1794 | 7.8 | | 0.13017 | 3.5 | | | 0.06612 | 5.9 | | 791 | | 21 | 789 | 13 | 810 | 61 | 3 |
| 1.1663 | 7.8 | | 0.12971 | 3.2 | | | 0.06621 | 7.7 | | 785 | | 21 | 786 | 12 | 813 | 81 | 3 |
| **Ratios** | | | | | | | | | |  | **Ages** | | | | | | |
| 207Pb  235U | error (2s%) | | 206Pb  238U | error (2s%) | | | 207Pb  206U | error  (2s%) | | 207Pb  235U | | error  (1s abs) | 206Pb  238U | error  (1s abs) | 207Pb  206U | error  (1s abs) | % dis-cordance |
| 1.1506 | 5.9 | | 0.12913 | 3.4 | | | 0.06442 | 5.8 | | 778 | | 16 | 783 | 12 | 756 | 61 | -4 |
| 1.1266 | 11.1 | | 0.12912 | 3.6 | | | 0.06253 | 9.7 | | 766 | | 30 | 783 | 13 | 692 | 103 | -13 |
| 1.2770 | 10.5 | | 0.12904 | 3.3 | | | 0.07349 | 10.9 | | 836 | | 30 | 782 | 12 | 1027 | 110 | 24 |
| 1.1646 | 8.8 | | 0.12875 | 4.2 | | | 0.06587 | 6.7 | | 784 | | 24 | 781 | 15 | 802 | 70 | 3 |
| 1.1246 | 8.4 | | 0.12840 | 3.1 | | | 0.06444 | 8.4 | | 765 | | 23 | 779 | 11 | 756 | 88 | -3 |
| 1.1647 | 13.1 | | 0.12830 | 6.6 | | | 0.06559 | 10.1 | | 784 | | 36 | 778 | 24 | 793 | 106 | 2 |
| 1.2079 | 9.1 | | 0.12824 | 3.9 | | | 0.06815 | 7.7 | | 804 | | 25 | 778 | 14 | 873 | 80 | 11 |
| 1.1608 | 6.1 | | 0.12821 | 3.5 | | | 0.06519 | 5.0 | | 782 | | 17 | 778 | 13 | 781 | 53 | 0 |
| 1.1090 | 7.2 | | 0.12793 | 3.4 | | | 0.06265 | 6.7 | | 758 | | 19 | 776 | 12 | 696 | 71 | -11 |
| 1.1016 | 10.3 | | 0.12726 | 7.3 | | | 0.06323 | 13.9 | | 754 | | 27 | 772 | 27 | 716 | 148 | -8 |
| 1.1854 | 7.1 | | 0.12689 | 4.5 | | | 0.06723 | 6.1 | | 794 | | 19 | 770 | 16 | 845 | 63 | 9 |
| 1.1225 | 5.7 | | 0.12667 | 5.1 | | | 0.06460 | 4.7 | | 764 | | 15 | 769 | 18 | 761 | 49 | -1 |
| 1.0792 | 8.8 | | 0.12662 | 4.3 | | | 0.06202 | 7.6 | | 743 | | 23 | 769 | 15 | 675 | 81 | -14 |
| 1.0844 | 15.9 | | 0.12618 | 4.4 | | | 0.06238 | 19.1 | | 746 | | 42 | 766 | 16 | 687 | 203 | -11 |
| 1.1247 | 7.2 | | 0.12516 | 3.3 | | | 0.06365 | 5.8 | | 765 | | 19 | 760 | 12 | 730 | 61 | -4 |
| 1.1931 | 6.6 | | 0.12297 | 4.1 | | | 0.07043 | 5.4 | | 797 | | 18 | 748 | 14 | 941 | 56 | 21 |
| 0.9492 | 8.3 | | 0.10851 | 5.0 | | | 0.06302 | 7.8 | | 678 | | 21 | 664 | 16 | 709 | 83 | 6 |
| 0.8399 | 4.8 | | 0.09863 | 3.0 | | | 0.06177 | 4.5 | | 619 | | 11 | 606 | 9 | 666 | 48 | 9 |
