# Supplementary material
Source: publisher figshare collection journal article supplement (https://geolsoc.figshare.com/articles/dataset/_/3454421)
Supplement: Supplementary file 1 [file 1]

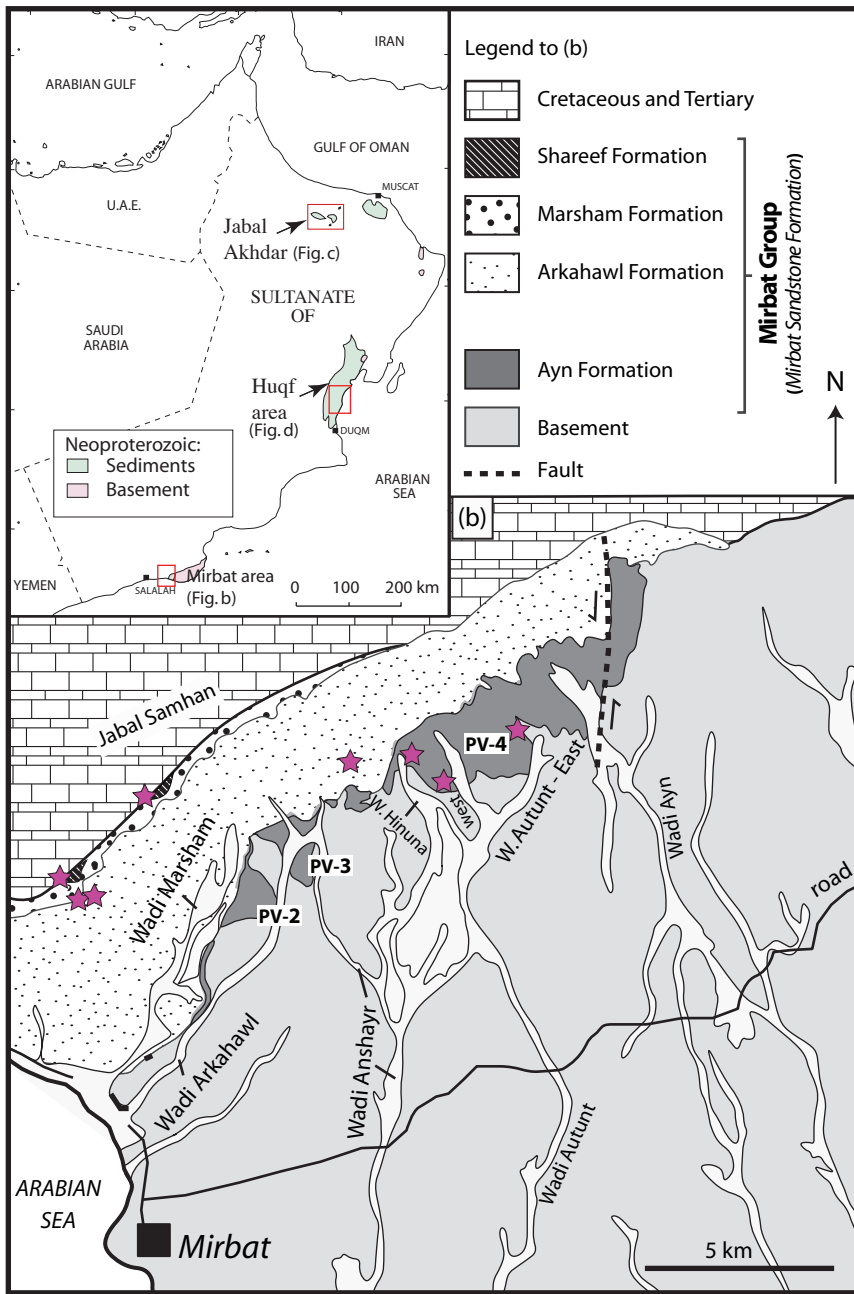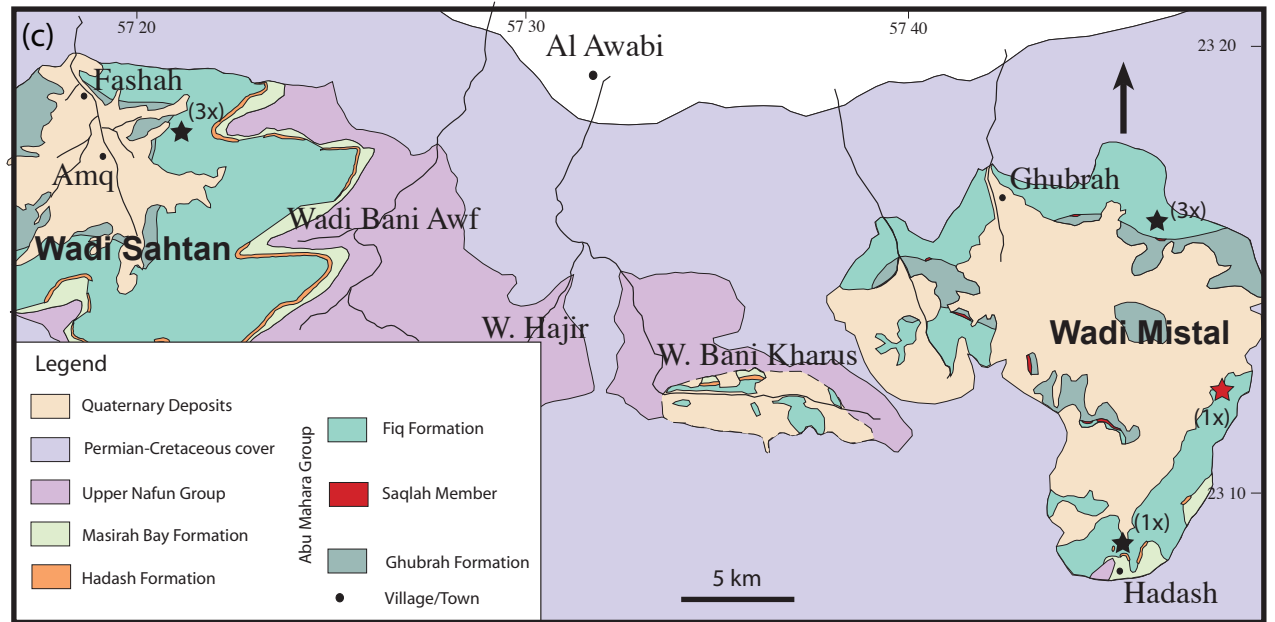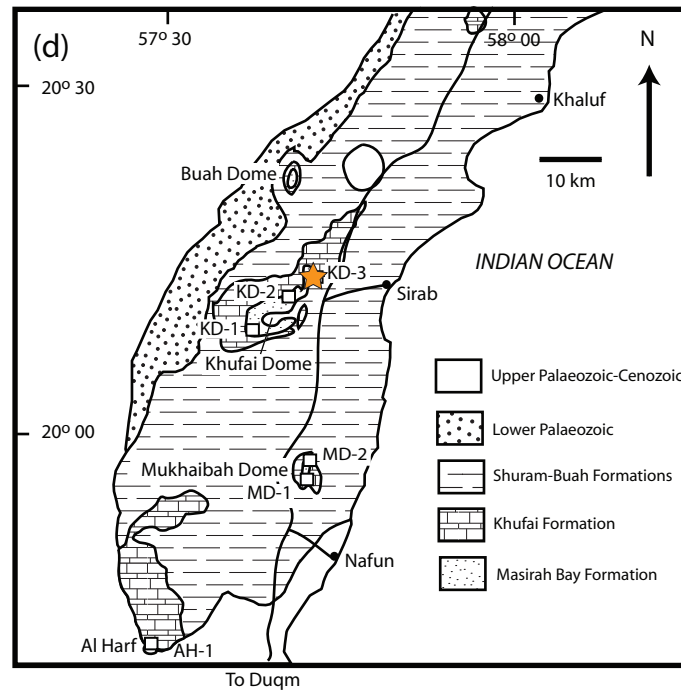

Figure S1: Outcrop map of Oman (a) and geological maps showing the sampled localities (stars) for detrital zircons of the Mirbat Group (b), the Abu Mahara Group in the Jabal Akhdar (Ghubrah in green; Saqlah in red; Fiq in black) (c), and the Masirah Bay Formation of the Huqf area (d). Map(c) adapted from Leather *et al.* (2001) and (d) adapted from Allen & Leather (2006).
